# Supplementary material for: Hematological and Serum Biochemical Reference Intervals for Alphaxalone Sedated Common Marmosets (Callithrix jacchus)
Source: MDPI journal article supplement (doi:10.3390/ani14050790), 2024-03-03
Supplement: s1 [file s1]

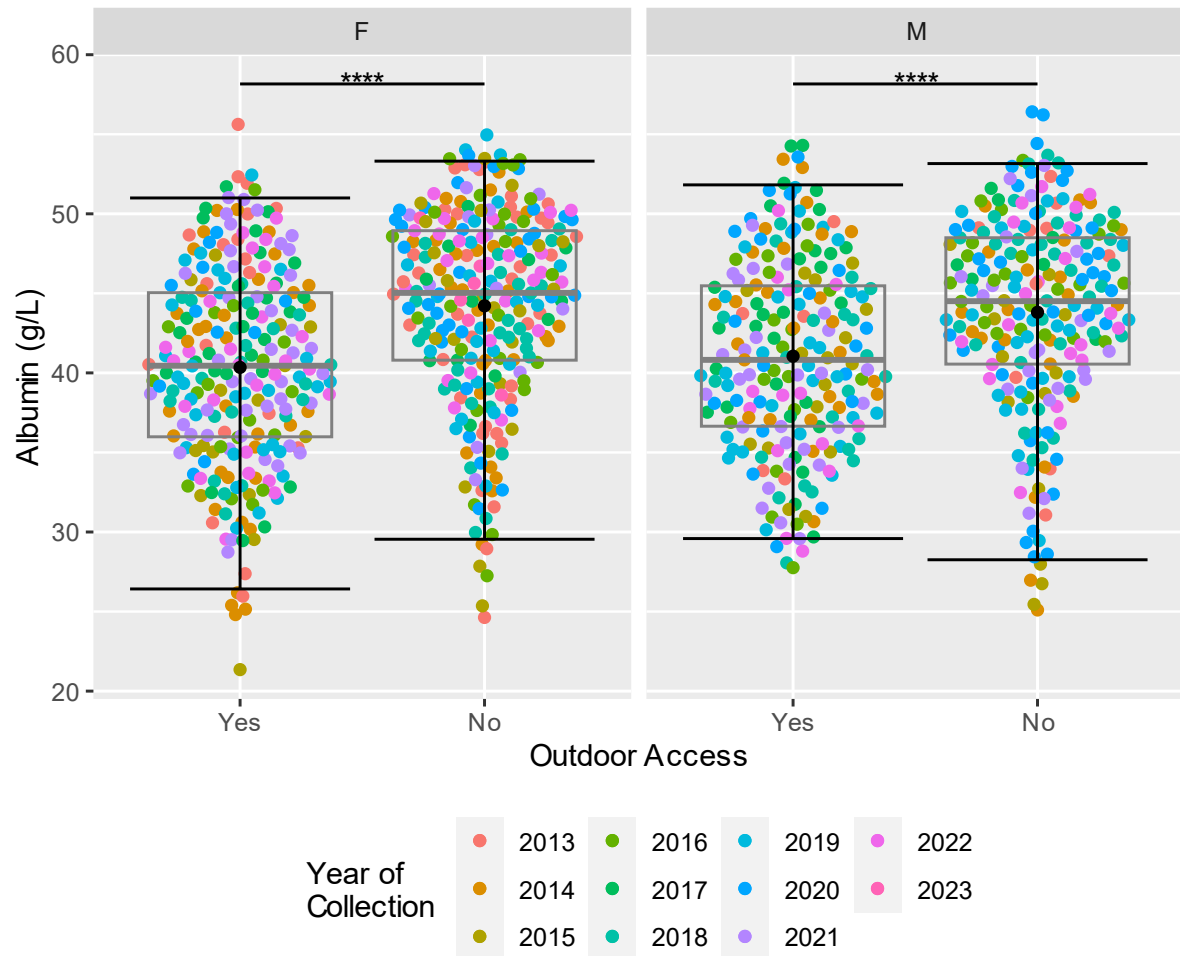

Figure S3 1. Albumin levels according to outdoor access in adult common marmosets. Boxes indicate median and quartile ranges; black point indicates arithmetic mean and error bars indicate the normal range. Symbol colours indicate year of collection; NS = not significant, NS = not significant, asterisks indicate statistical significance levels \* < 0.001, \*\* < 0.0001, \*\*\* < 0.00001, \*\*\*\* < 0.000001

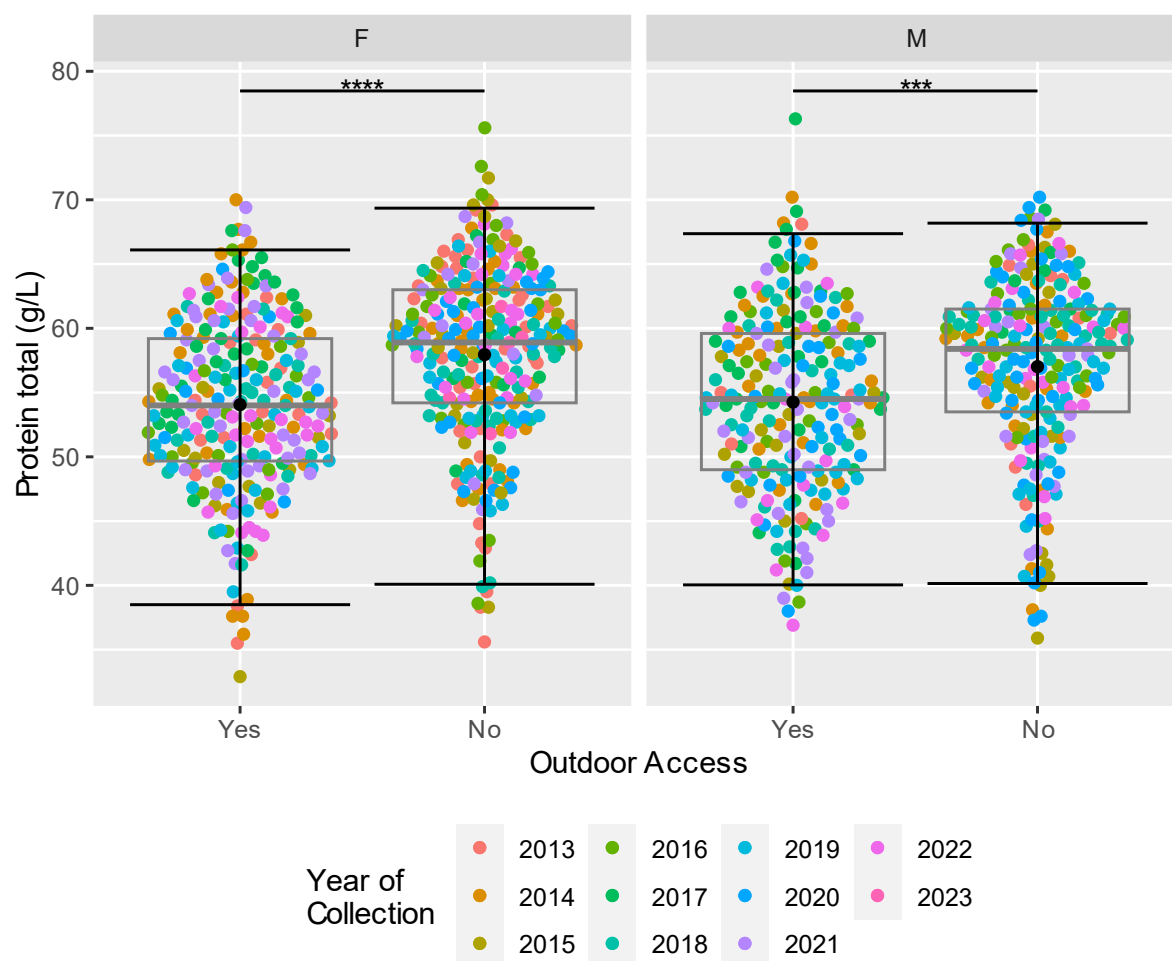

Figure S3 2. Total Protein levels according to outdoor access in adult common marmosets. Boxes indicate median and quartile ranges; black point indicates arithmetic mean and error bars indicate the normal range. Symbol colours indicate year of collection; NS = not significant, asterisks indicate statistical significance levels \* < 0.001, \*\* < 0.0001, \*\*\* < 0.00001, \*\*\*\* < 0.000001

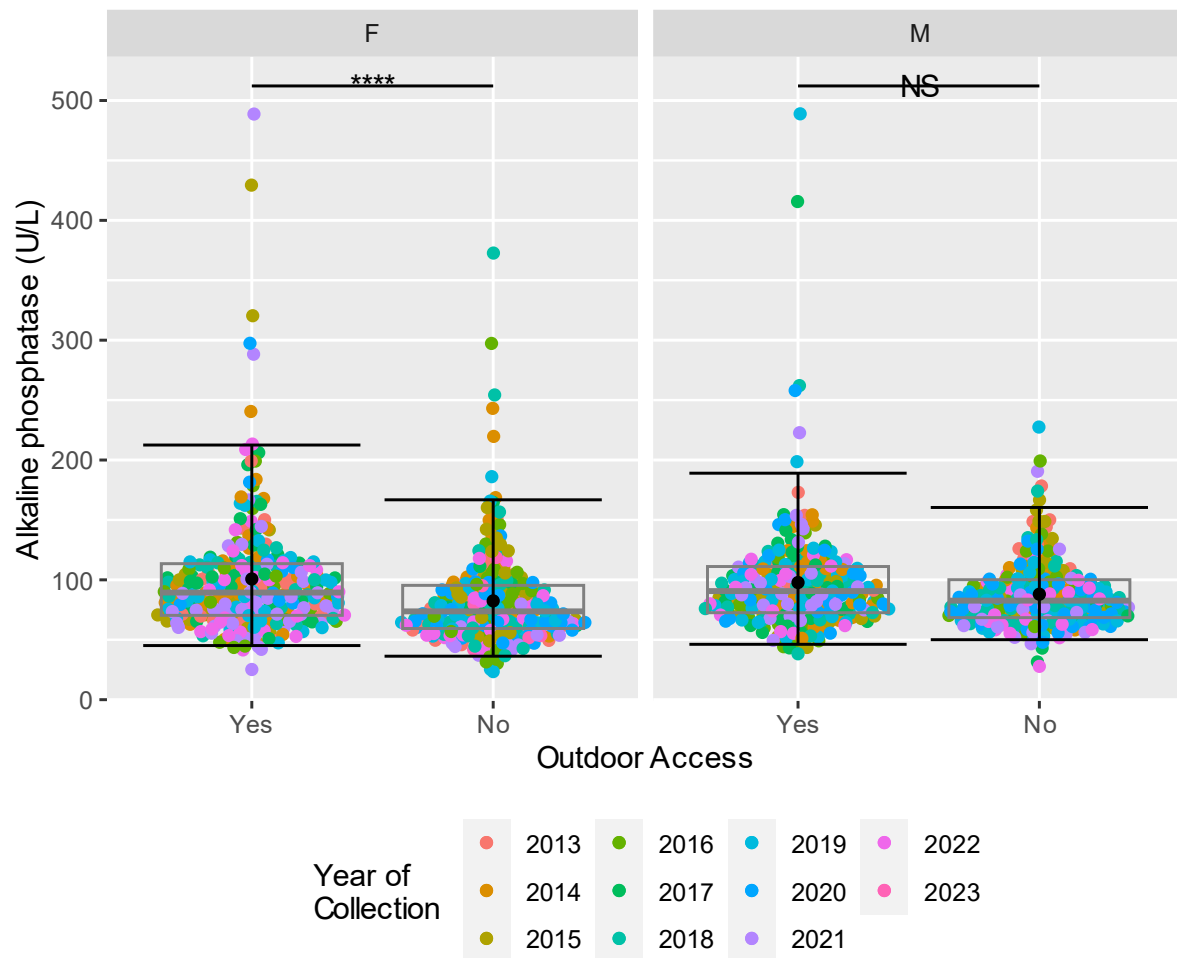

Figure S3 3. Alkaline Phosphatase levels according to outdoor access in adult common marmosets. Boxes indicate median and quartile ranges; black point indicates arithmetic mean and error bars indicate the normal range. Symbol colours indicate year of collection; NS = not significant, asterisks indicate statistical significance levels \* < 0.001, \*\* < 0.0001, \*\*\* < 0.00001, \*\*\*\* < 0.000001

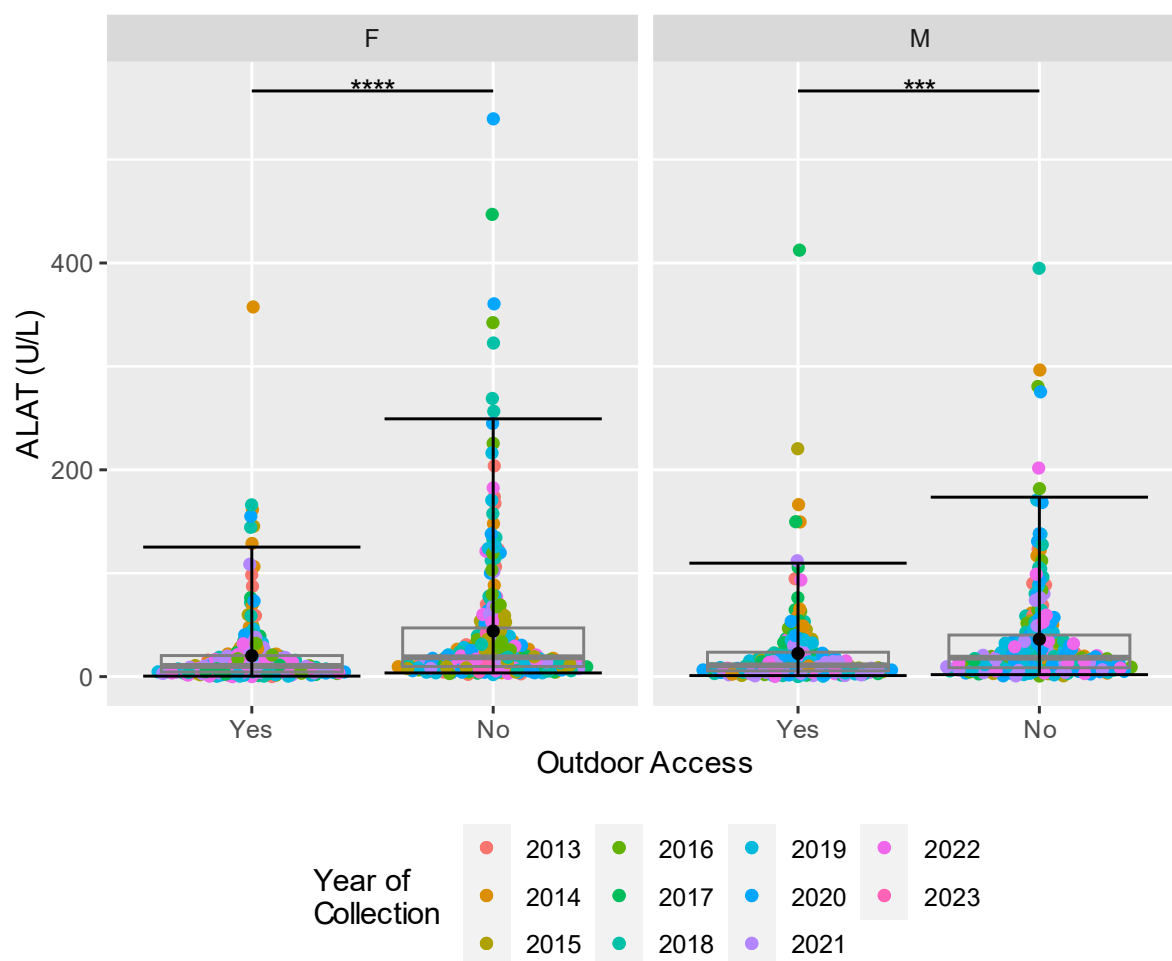

Figure S3 4. ALAT levels according to outdoor access in adult common marmosets. Boxes indicate median and quartile ranges; black point indicates arithmetic mean and error bars indicate the normal range. Symbol colours indicate year of collection; NS = not significant, asterisks indicate statistical significance levels \* < 0.001, \*\* < 0.0001, \*\*\* < 0.00001, \*\*\*\* < 0.000001



Figure S3 5. ASAT levels according to outdoor access in adult common marmosets. Boxes indicate median and quartile ranges; black point indicates arithmetic mean and error bars indicate the normal range. Symbol colours indicate year of collection; NS = not significant, asterisks indicate statistical significance levels \* < 0.001, \*\* < 0.0001, \*\*\* < 0.00001, \*\*\*\* < 0.000001

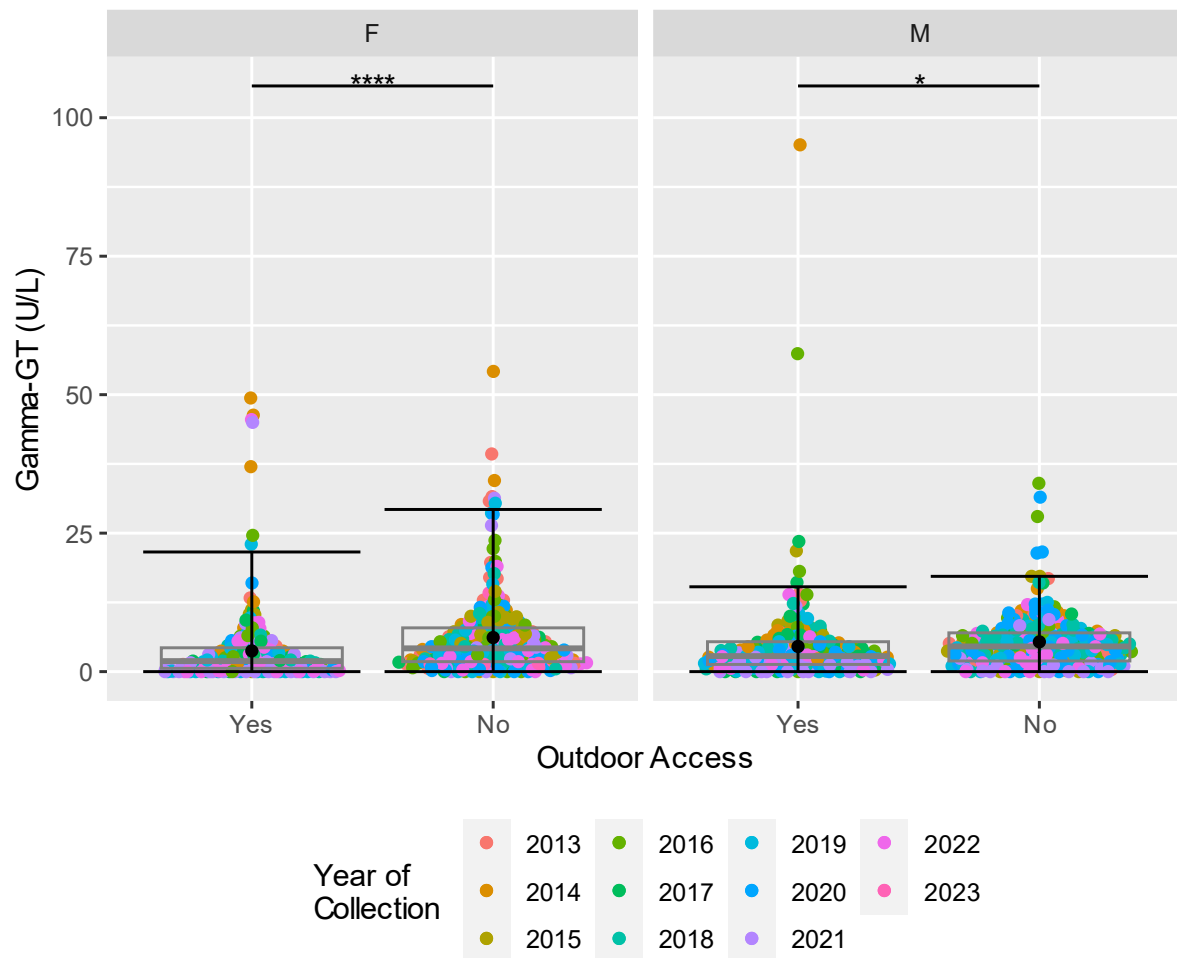

Figure S3 6. Gamma-GT levels according to outdoor access in adult common marmosets. Boxes indicate median and quartile ranges; black point indicates arithmetic mean and error bars indicate the normal range. Symbol colours indicate year of collection; NS = not significant, asterisks indicate statistical significance levels \*  $< 0.001$ , \*\*  $< 0.0001$ , \*\*\*  $< 0.000001$ , \*\*\*\*  $< 0.0000001$

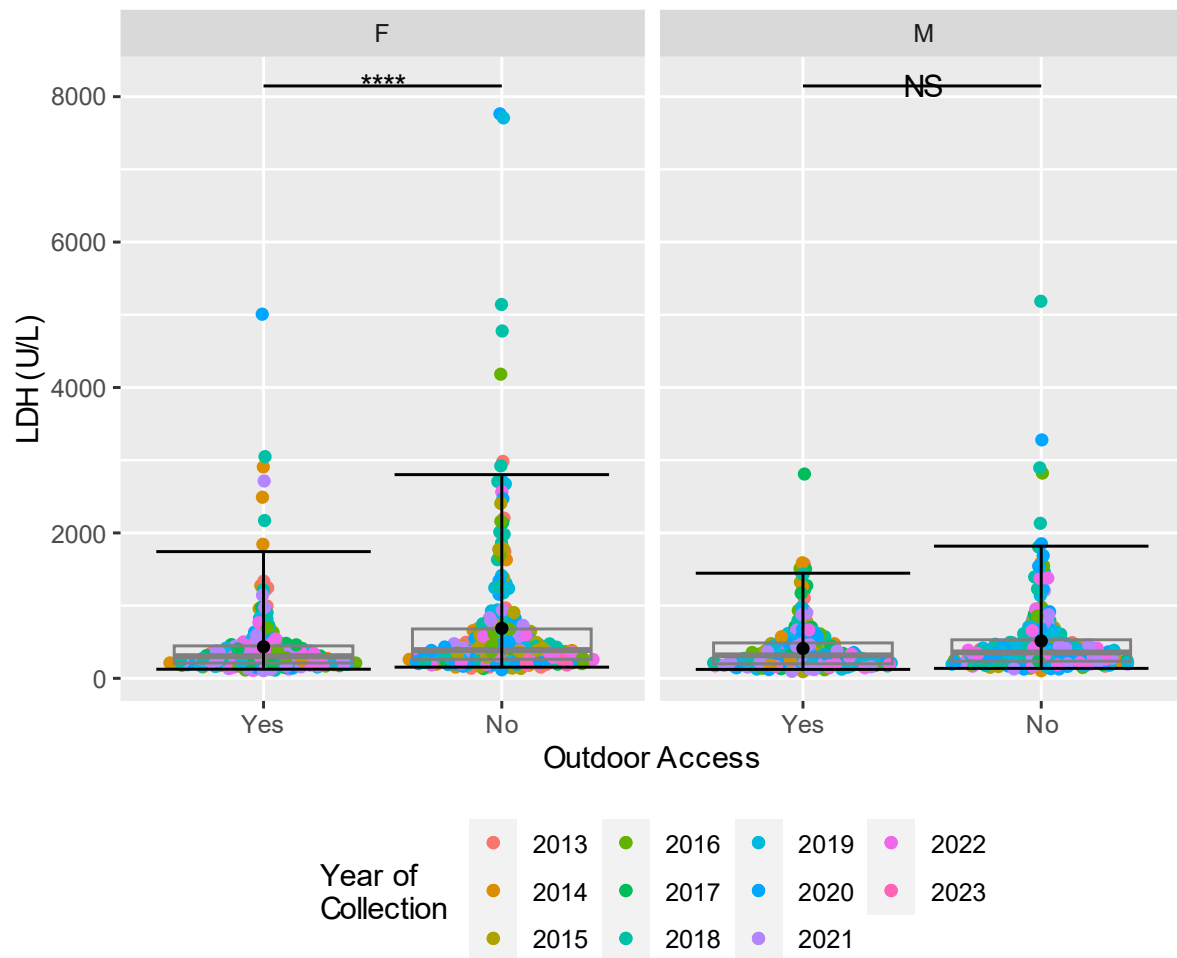

Figure S3 7. LDH levels according to outdoor access in adult common marmosets. Boxes indicate median and quartile ranges; black point indicates arithmetic mean and error bars indicate the normal range. Symbol colours indicate year of collection; NS = not significant, asterisks indicate statistical significance levels \* < 0.001, \*\* < 0.0001, \*\*\* < 0.00001, \*\*\*\* < 0.000001

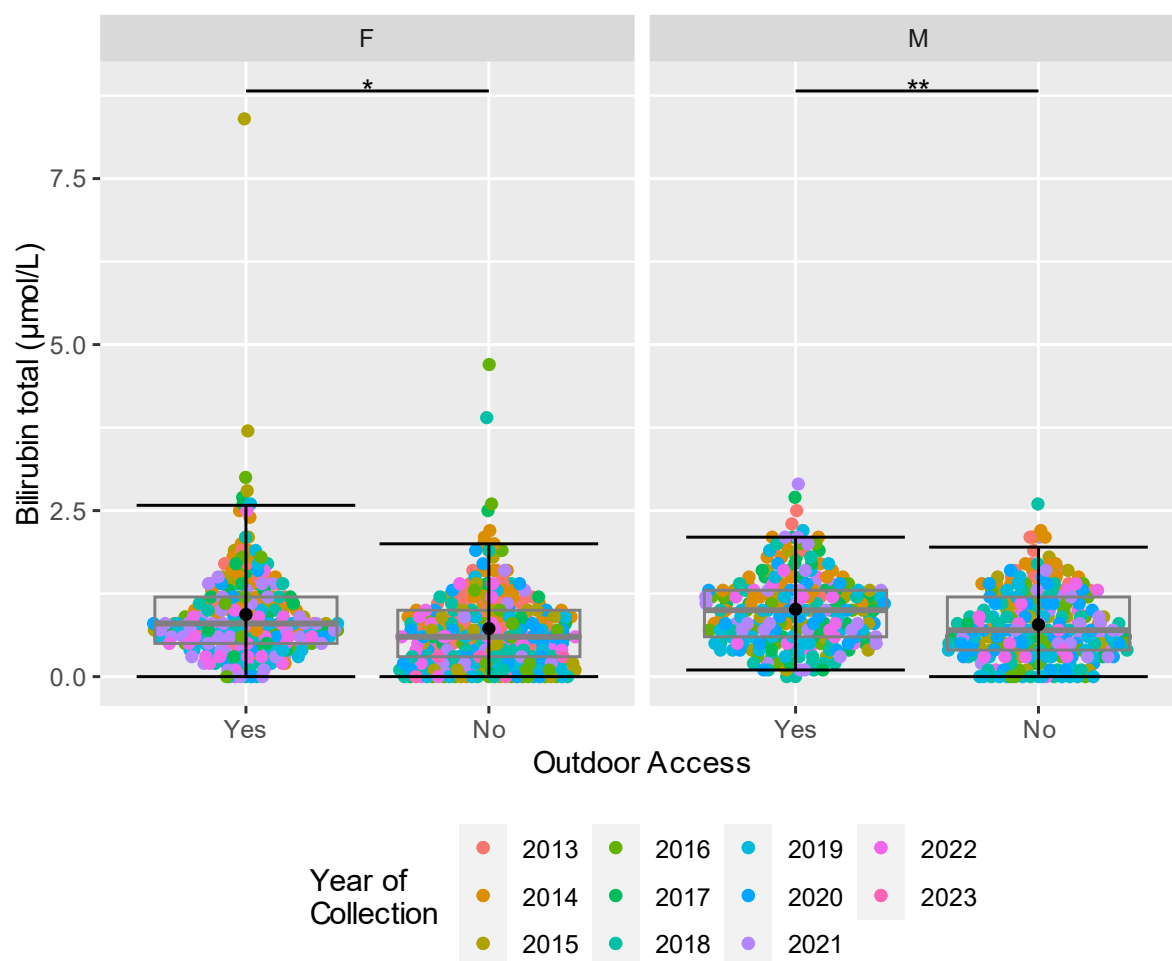

Figure S3 8. Total Bilirubin levels according to outdoor access in adult common marmosets. Boxes indicate median and quartile ranges; black point indicates arithmetic mean and error bars indicate the normal range. Symbol colours indicate year of collection; NS = not significant, asterisks indicate statistical significance levels \* < 0.001, \*\* < 0.0001, \*\*\* < 0.00001, \*\*\*\* < 0.000001



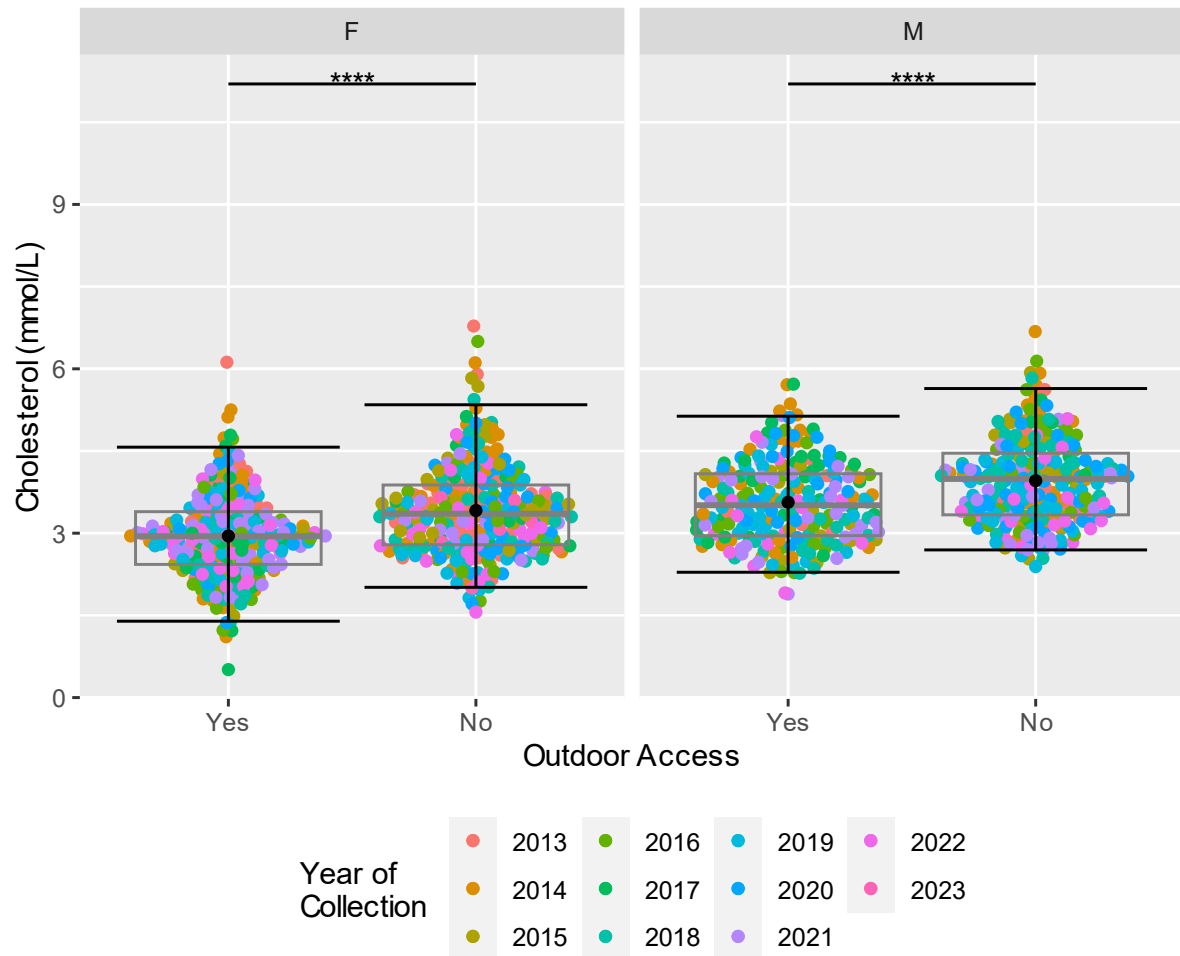

Figure S3 9. Cholesterol levels according to outdoor access in adult common marmosets. Boxes indicate median and quartile ranges; black point indicates arithmetic mean and error bars indicate the normal range. Symbol colours indicate year of collection; NS = not significant, asterisks indicate statistical significance levels \* < 0.001, \*\* < 0.0001, \*\*\* < 0.00001, \*\*\*\* < 0.000001

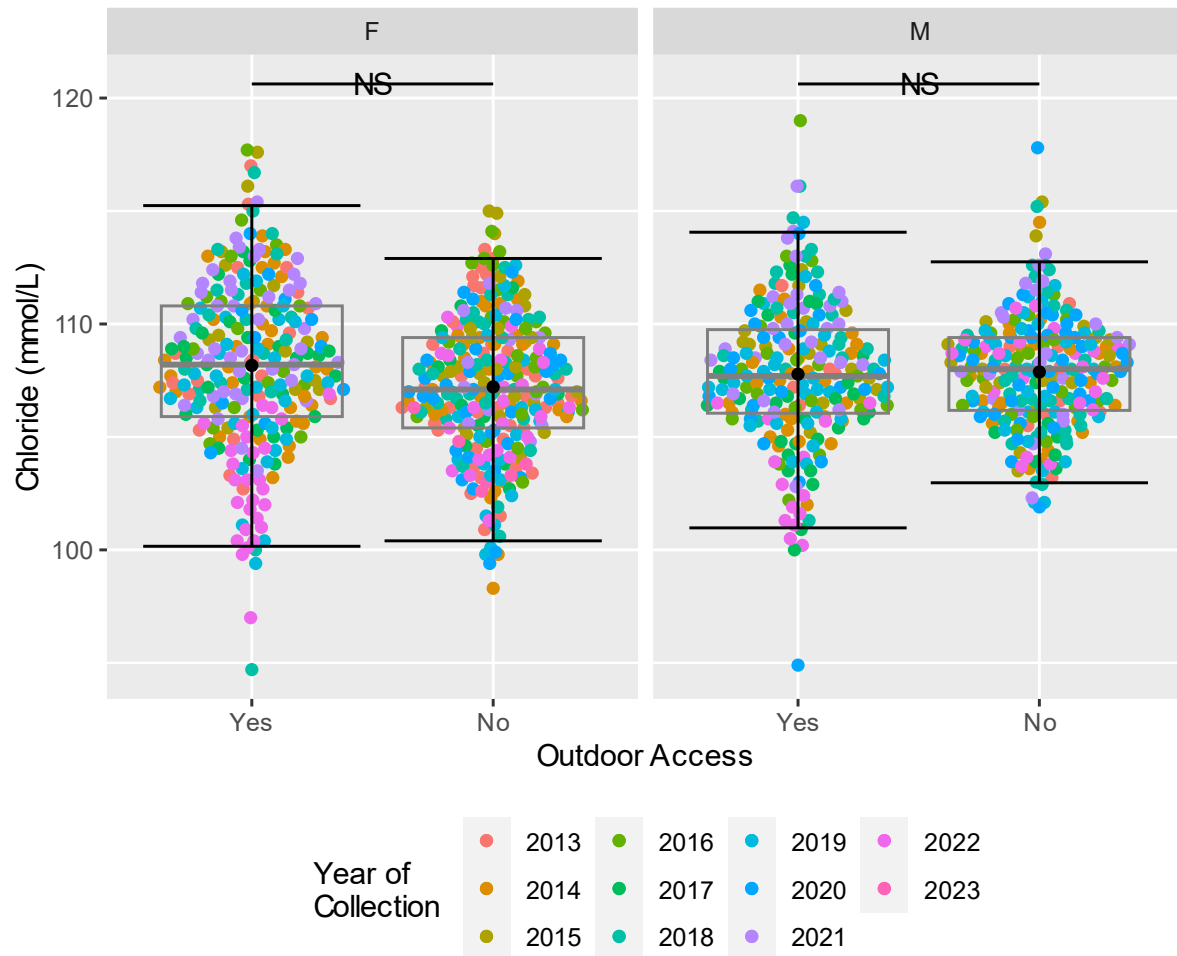

Figure S3 10. Chloride levels according to outdoor access in adult common marmosets. Boxes indicate median and quartile ranges; black point indicates arithmetic mean and error bars indicate the normal range. Symbol colours indicate year of collection; NS = not significant, asterisks indicate statistical significance levels \* < 0.001, \*\* < 0.0001, \*\*\* < 0.00001, \*\*\*\* < 0.000001

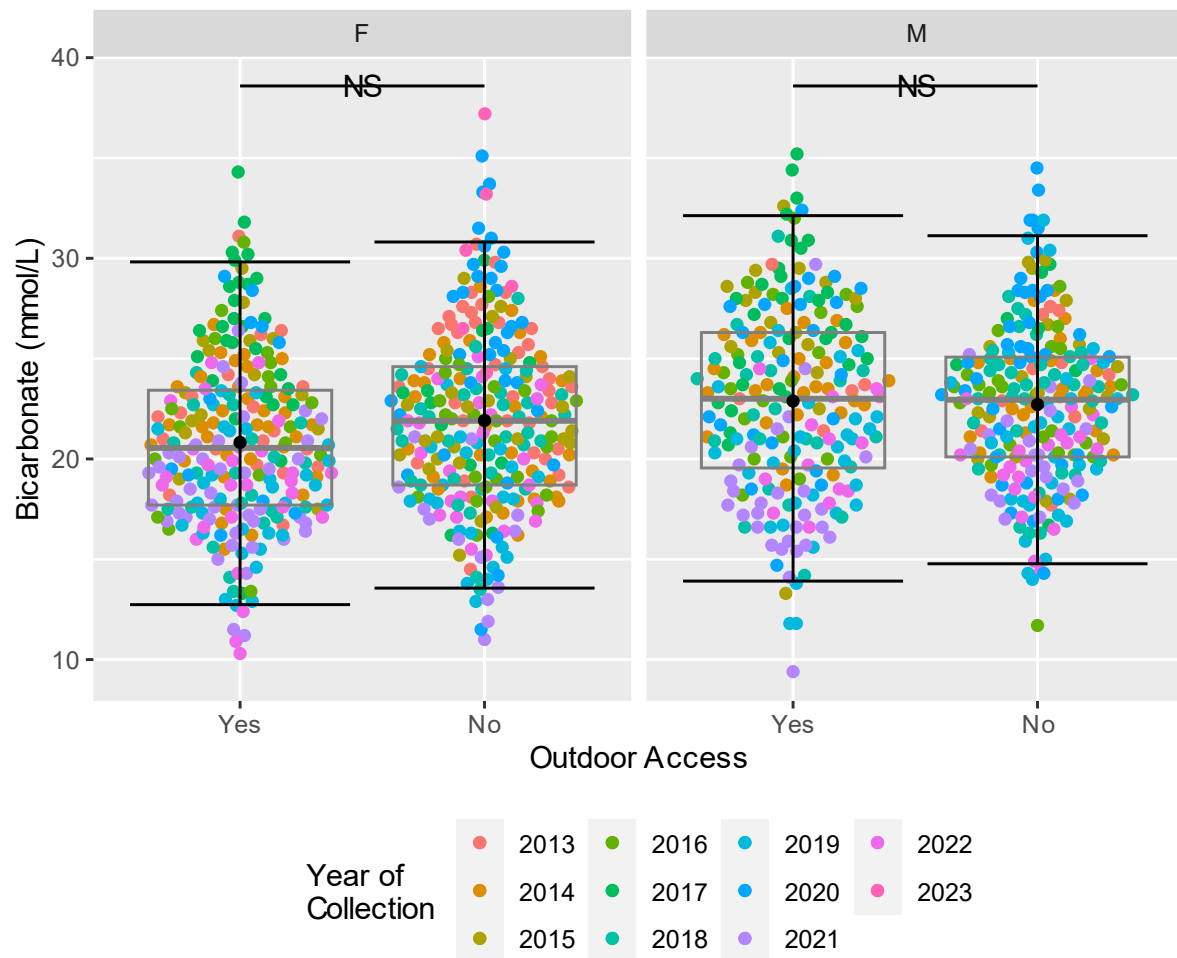

Figure S3 11. Bicarbonate levels according to outdoor access in adult common marmosets. Boxes indicate median and quartile ranges; black point indicates arithmetic mean and error bars indicate the normal range. Symbol colours indicate year of collection; NS = not significant, asterisks indicate statistical significance levels \* < 0.001, \*\* < 0.0001, \*\*\* < 0.00001, \*\*\*\* < 0.000001

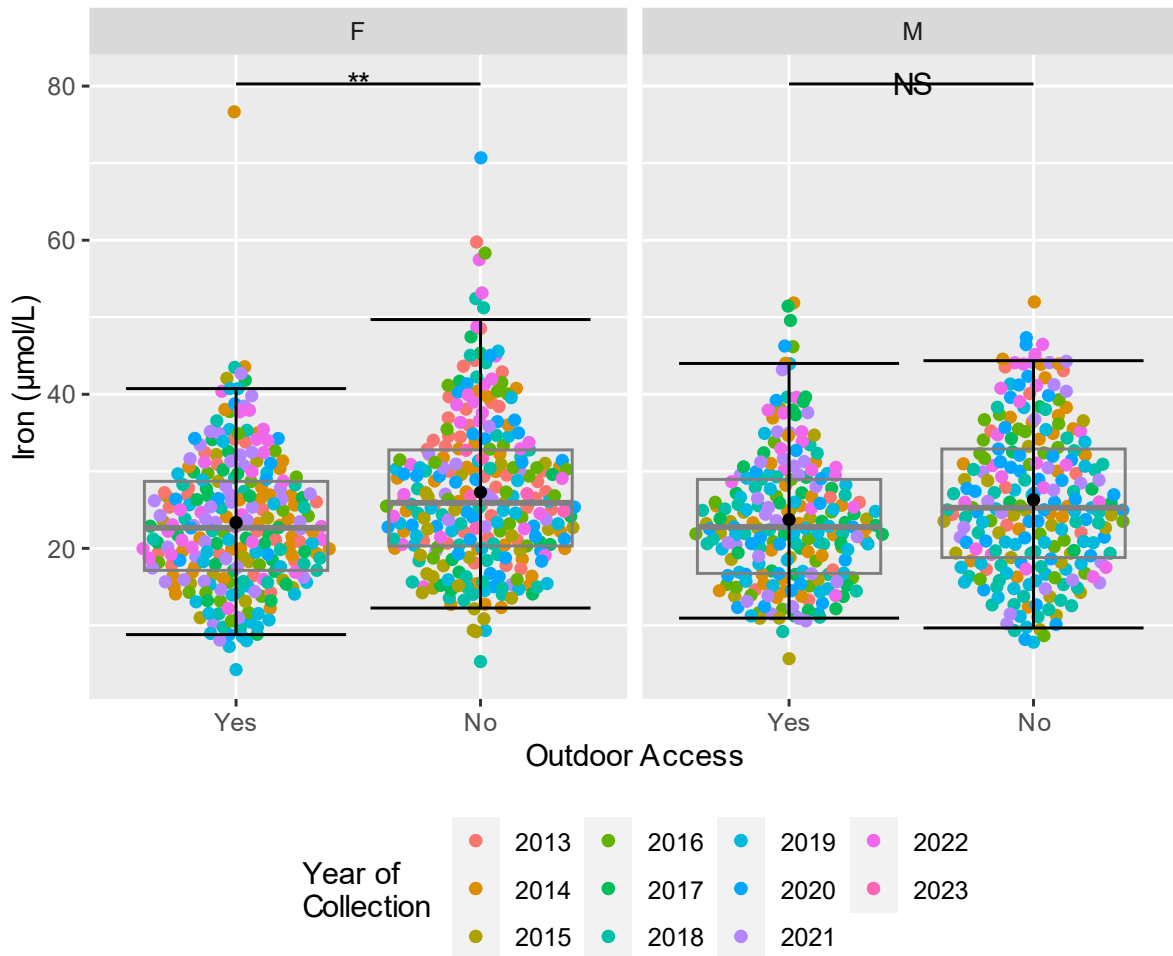

Figure S3 12. Iron levels according to outdoor access in adult common marmosets. Boxes indicate median and quartile ranges; black point indicates arithmetic mean and error bars indicate the normal range. Symbol colours indicate year of collection; NS = not significant, asterisks indicate statistical significance levels \* < 0.001, \*\* < 0.0001, \*\*\* < 0.00001, \*\*\*\* < 0.000001

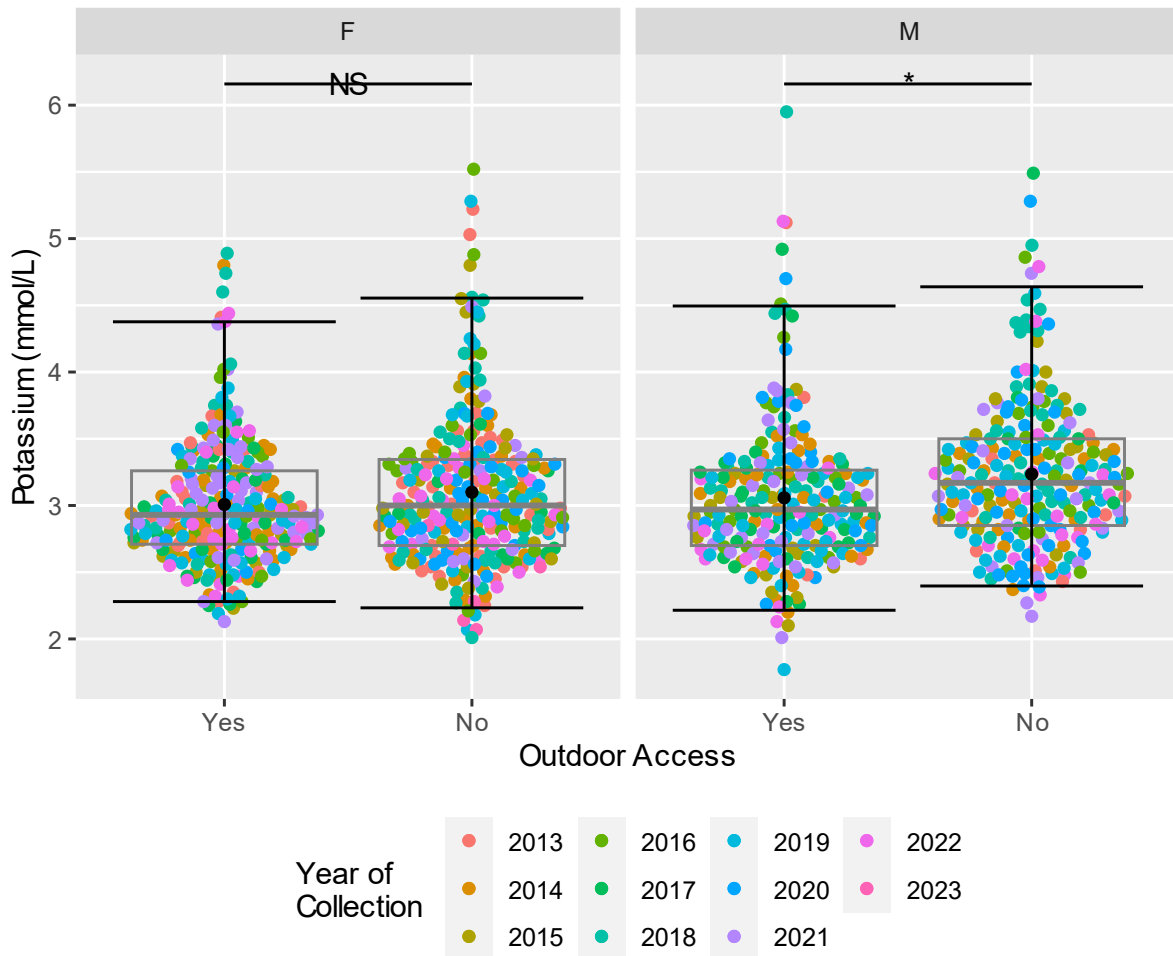

Figure S3 13. Potassium levels according to outdoor access in adult common marmosets. Boxes indicate median and quartile ranges; black point indicates arithmetic mean and error bars indicate the normal range. Symbol colours indicate year of collection; NS = not significant, asterisks indicate statistical significance levels \* < 0.001, \*\* < 0.0001, \*\*\* < 0.00001, \*\*\*\* < 0.000001

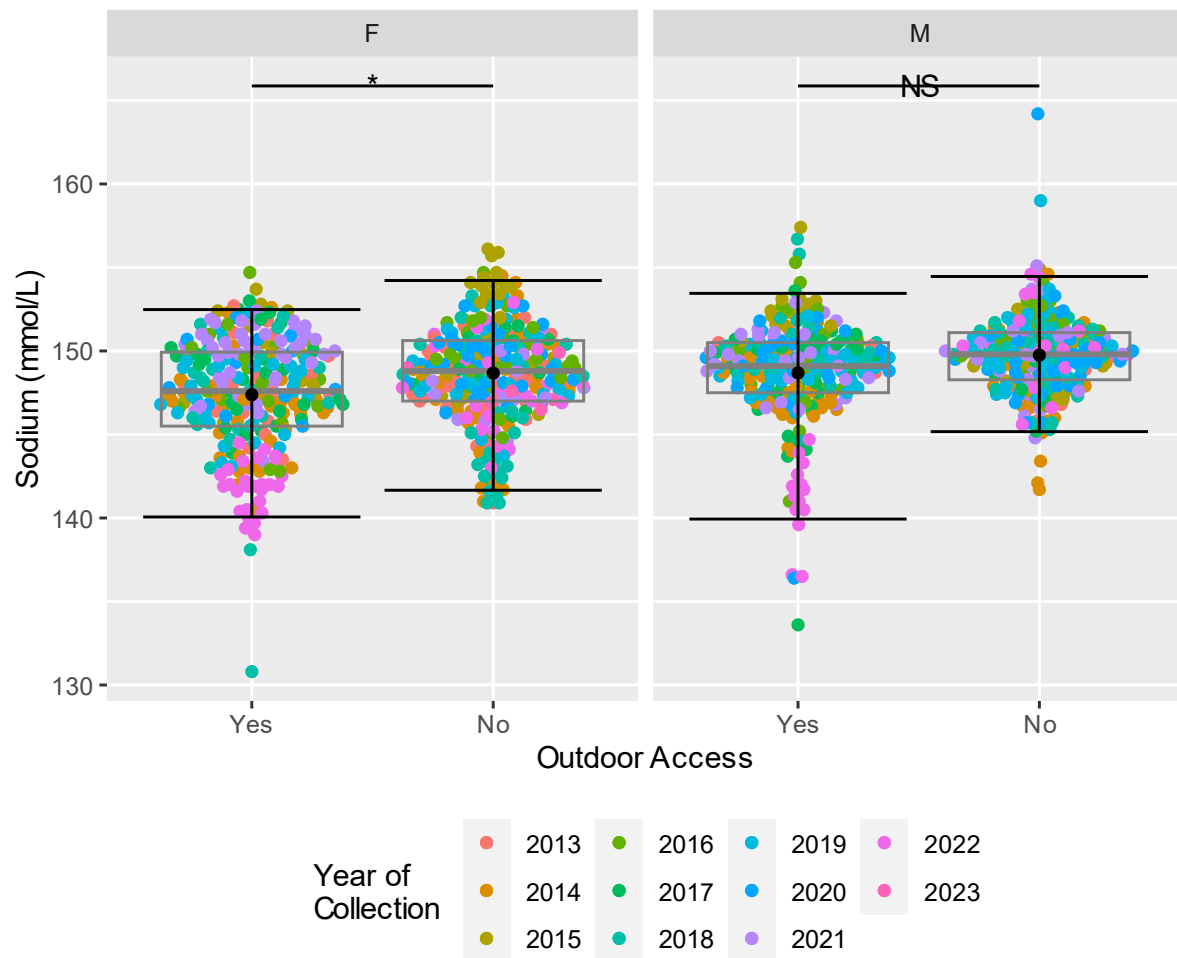

Figure S3 14. Sodium levels according to outdoor access in adult common marmosets. Boxes indicate median and quartile ranges; black point indicates arithmetic mean and error bars indicate the normal range. Symbol colours indicate year of collection; NS = not significant, asterisks indicate statistical significance levels \* < 0.001, \*\* < 0.0001, \*\*\* < 0.00001, \*\*\*\* < 0.000001

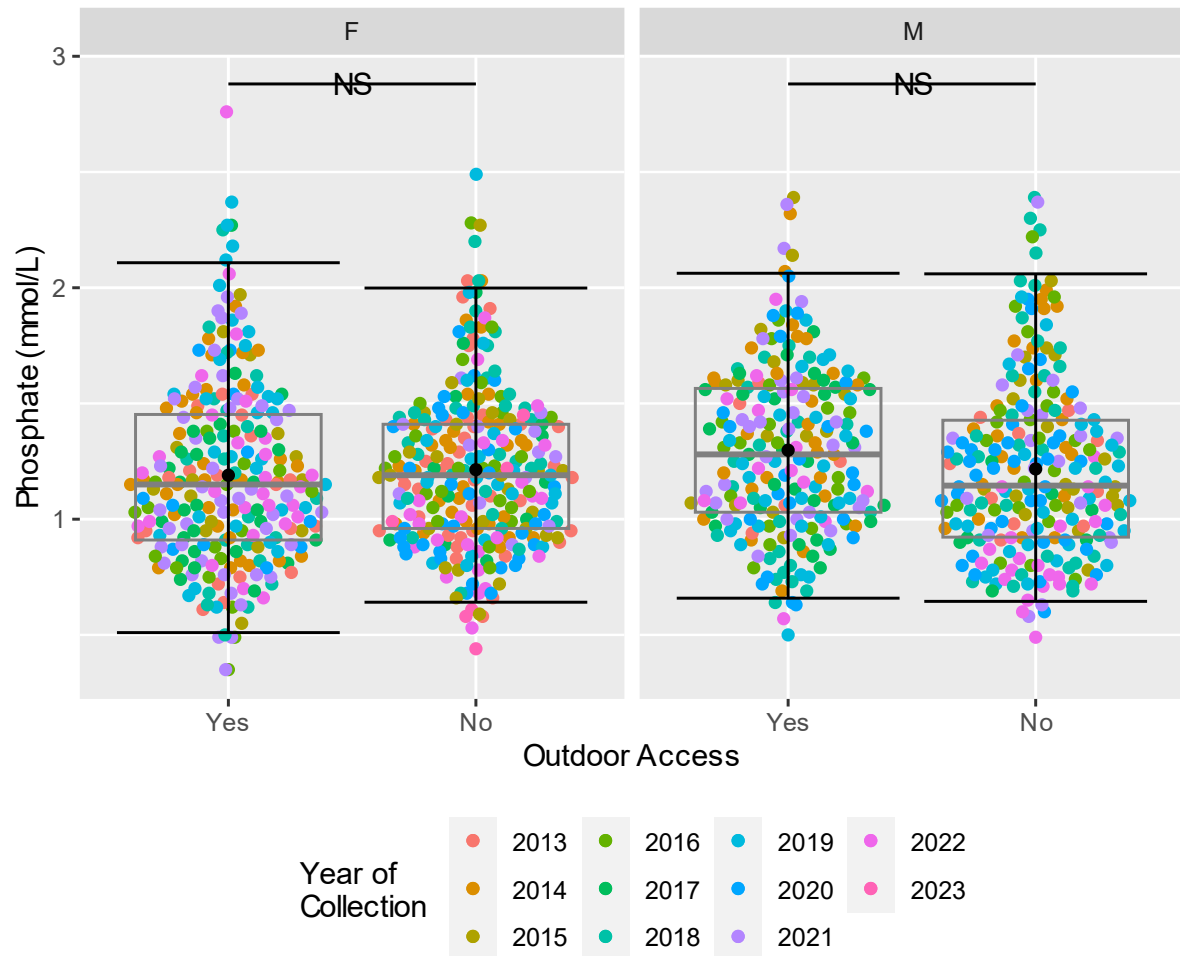

Figure S3 15. Phosphate levels according to outdoor access in adult common marmosets. Boxes indicate median and quartile ranges; black point indicates arithmetic mean and error bars indicate the normal range. Symbol colours indicate year of collection; NS = not significant, asterisks indicate statistical significance levels \* < 0.001, \*\* < 0.0001, \*\*\* < 0.00001, \*\*\*\* < 0.000001

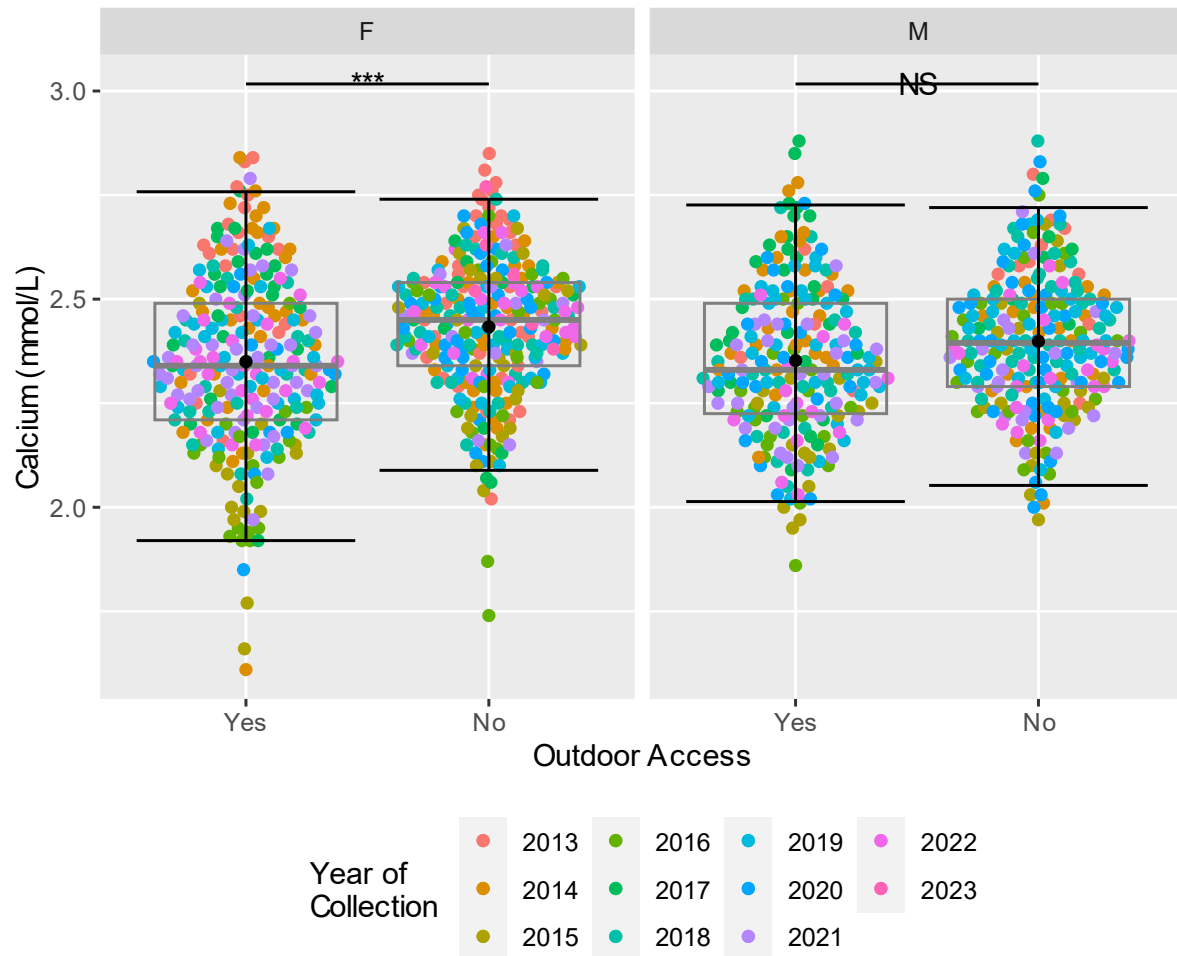

Figure S3 16. Calcium levels according to outdoor access in adult common marmosets. Boxes indicate median and quartile ranges; black point indicates arithmetic mean and error bars indicate the normal range. Symbol colours indicate year of collection; NS = not significant, asterisks indicate statistical significance levels \* < 0.001, \*\* < 0.0001, \*\*\* < 0.00001, \*\*\*\* < 0.000001



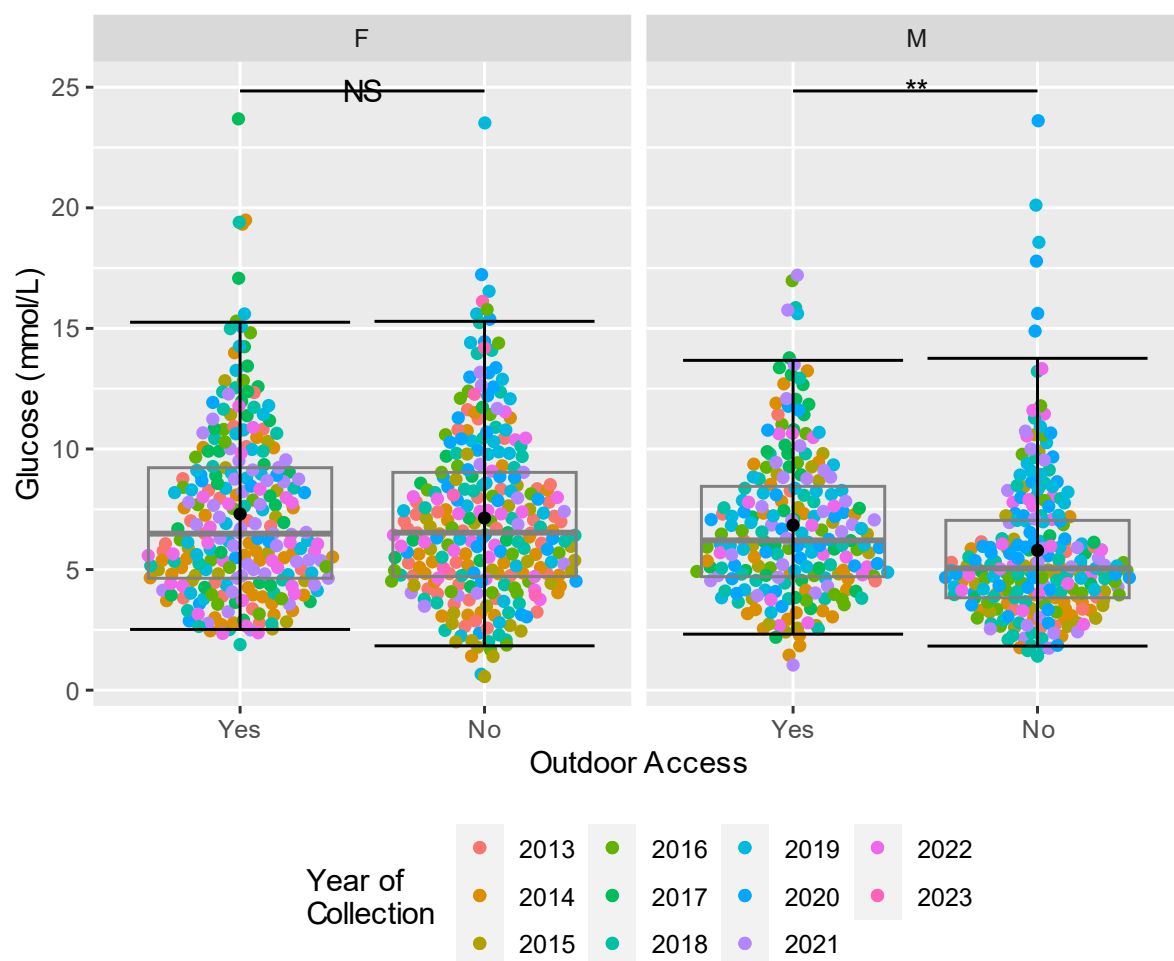

Figure S3 17. Glucose levels according to outdoor access in adult common marmosets. Boxes indicate median and quartile ranges; black point indicates arithmetic mean and error bars indicate the normal range. Symbol colours indicate year of collection; NS = not significant, asterisks indicate statistical significance levels \*  $< 0.001$ , \*\*  $< 0.0001$ , \*\*\*  $< 0.00001$ , \*\*\*\*  $< 0.000001$

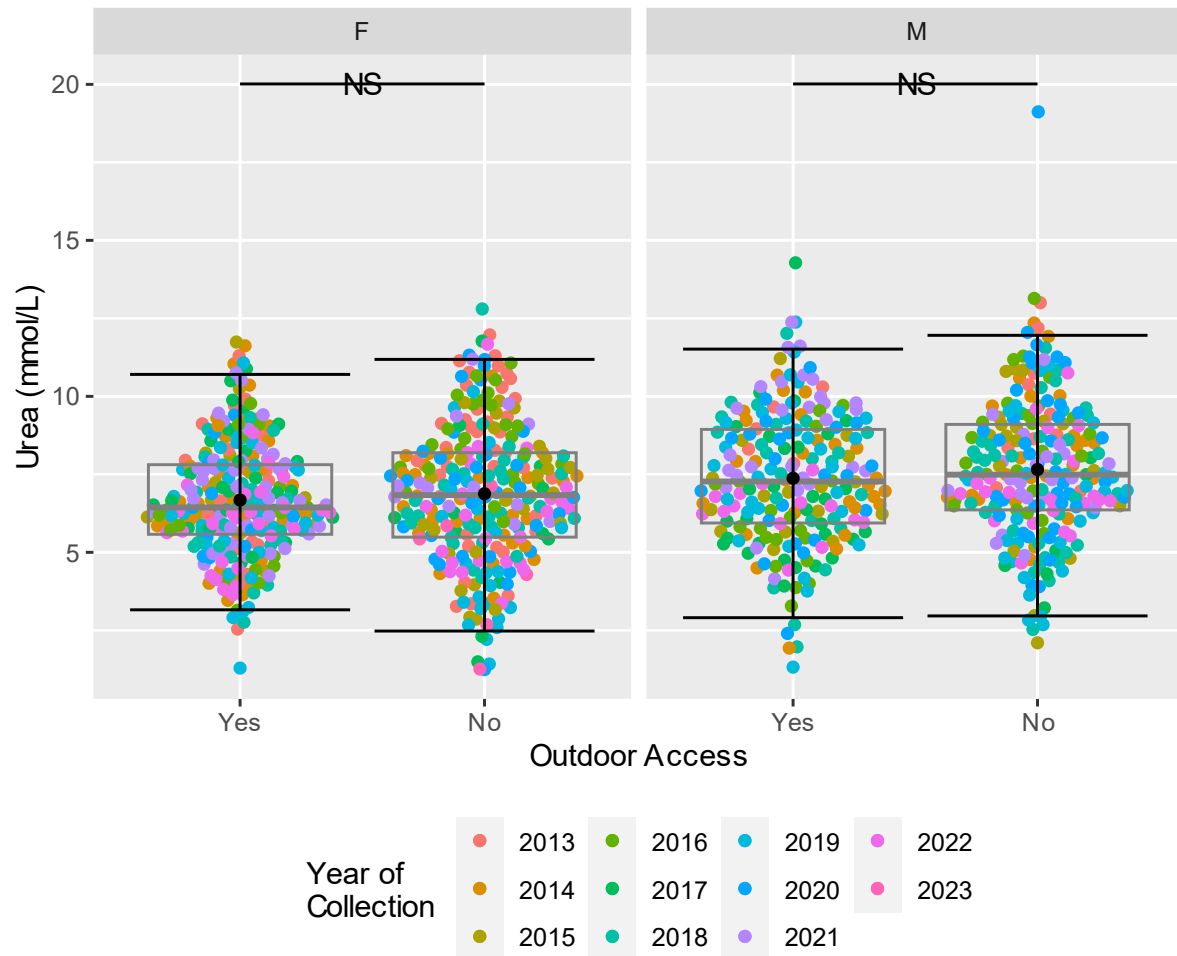

Figure S3 18. Urea levels according to outdoor access in adult common marmosets. Boxes indicate median and quartile ranges; black point indicates arithmetic mean and error bars indicate the normal range. Symbol colours indicate year of collection; NS = not significant, asterisks indicate statistical significance levels \* < 0.001, \*\* < 0.0001, \*\*\* < 0.00001, \*\*\*\* < 0.000001

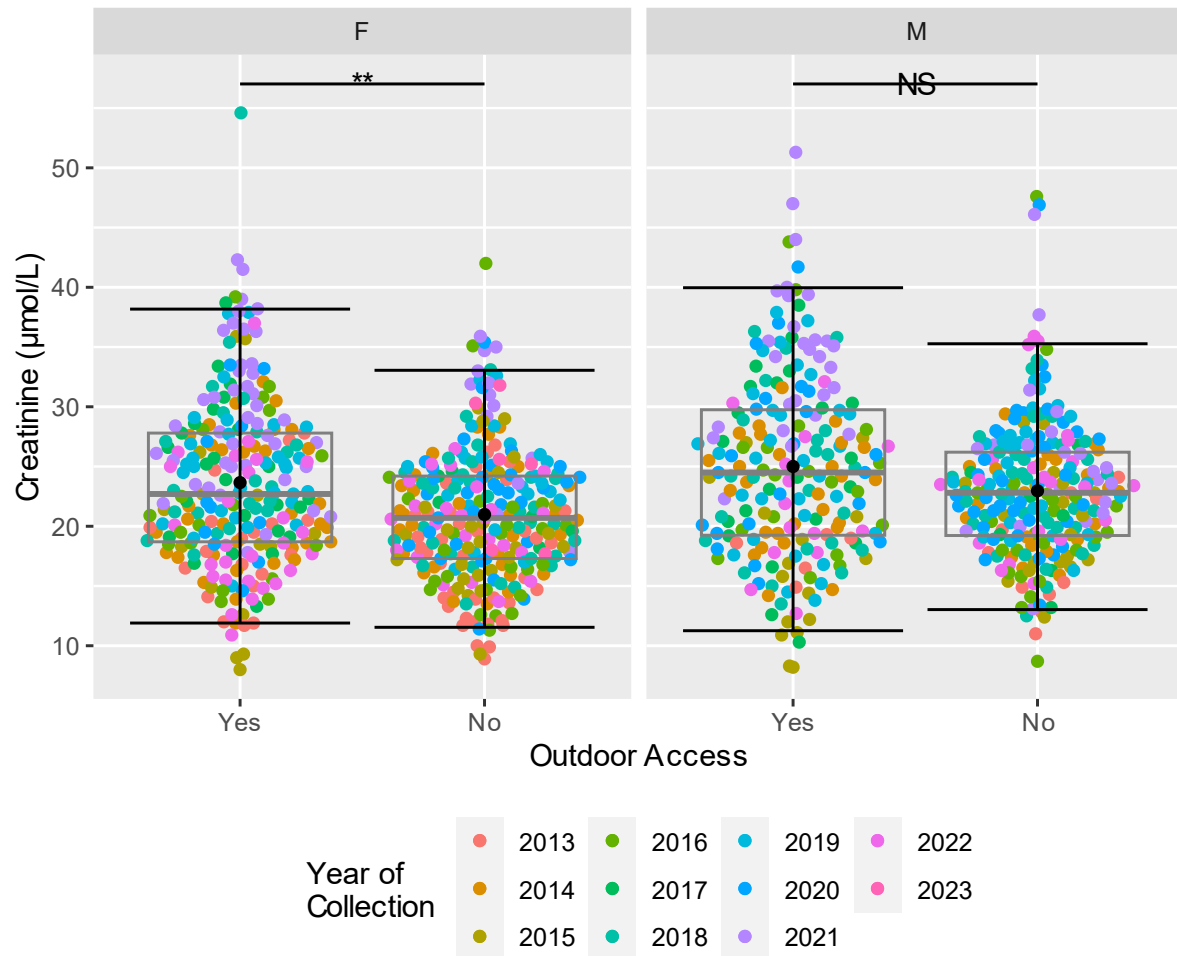

Figure S3 19. Creatinine levels according to outdoor access in adult common marmosets. Boxes indicate median and quartile ranges; black point indicates arithmetic mean and error bars indicate the normal range. Symbol colours indicate year of collection; NS = not significant, asterisks indicate statistical significance levels \* < 0.001, \*\* < 0.0001, \*\*\* < 0.00001, \*\*\*\* < 0.000001

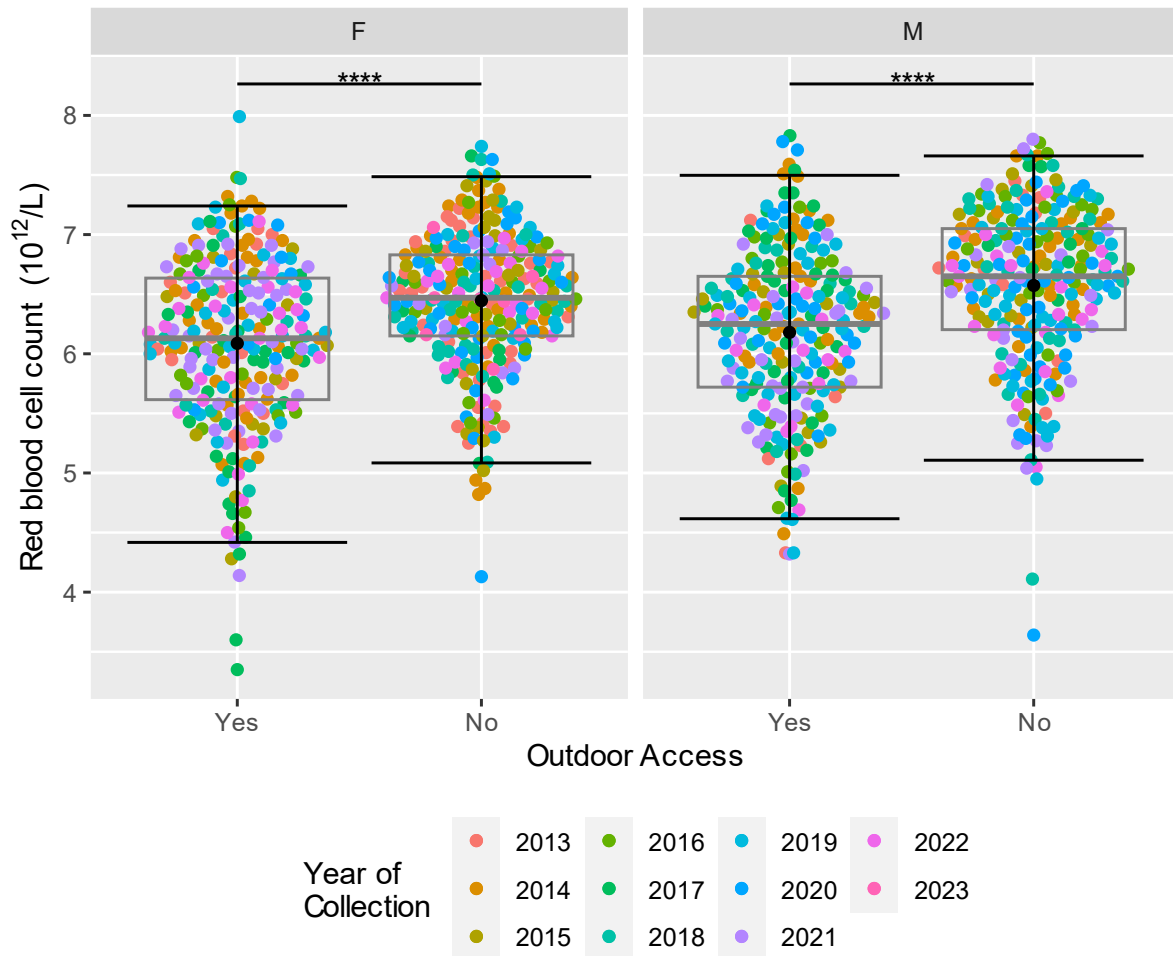

Figure S3 20. Red blood cell count according to outdoor access in adult common marmosets. Boxes indicate median and quartile ranges; black point indicates arithmetic mean and error bars indicate the normal range. Symbol colours indicate year of collection; NS = not significant, asterisks indicate statistical significance levels \* < 0.001, \*\* < 0.0001, \*\*\* < 0.00001, \*\*\*\* < 0.000001

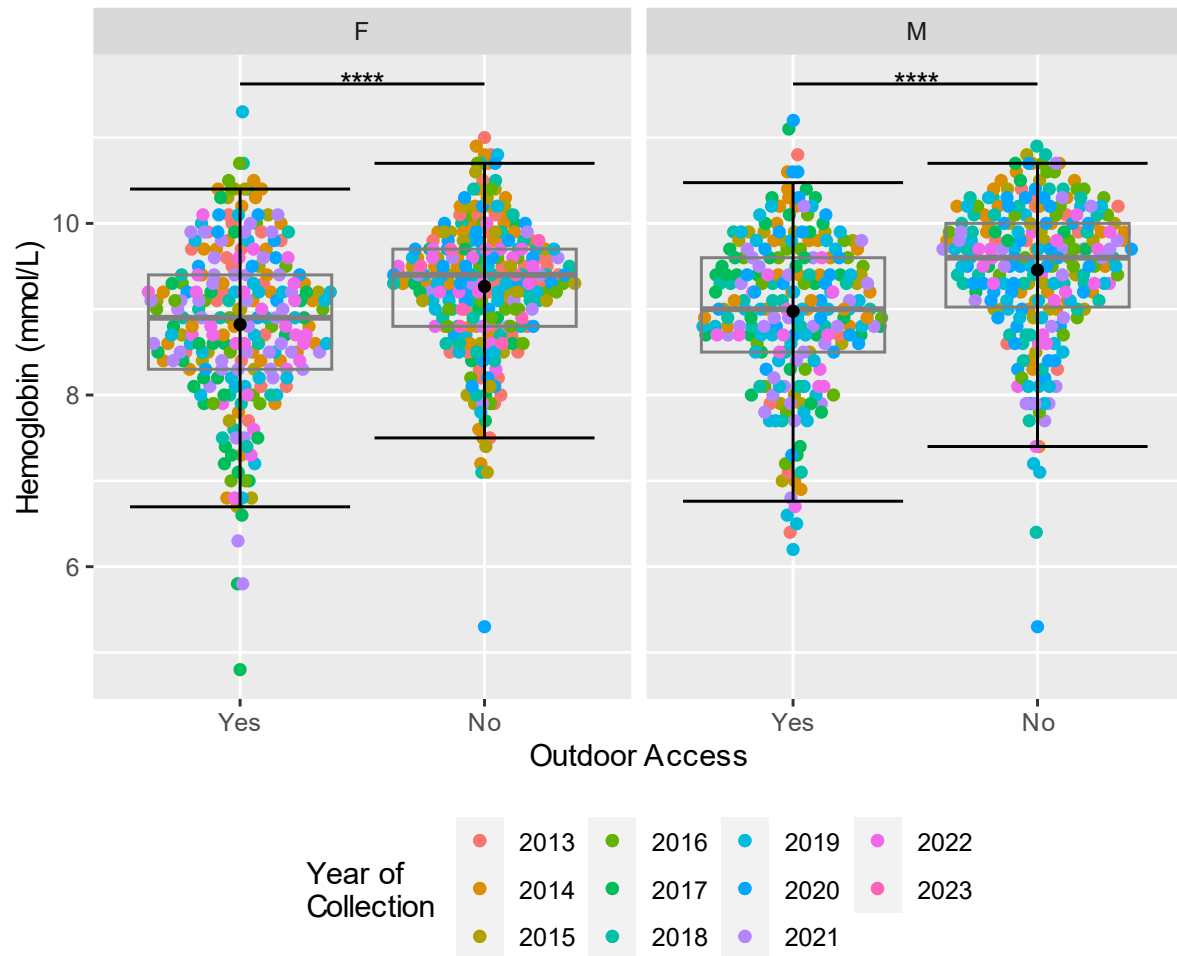

Figure S3 21. Haemoglobin levels according to outdoor access in adult common marmosets. Boxes indicate median and quartile ranges; black point indicates arithmetic mean and error bars indicate the normal range. Symbol colours indicate year of collection; NS = not significant, asterisks indicate statistical significance levels \* < 0.001, \*\* < 0.0001, \*\*\* < 0.00001, \*\*\*\* < 0.000001

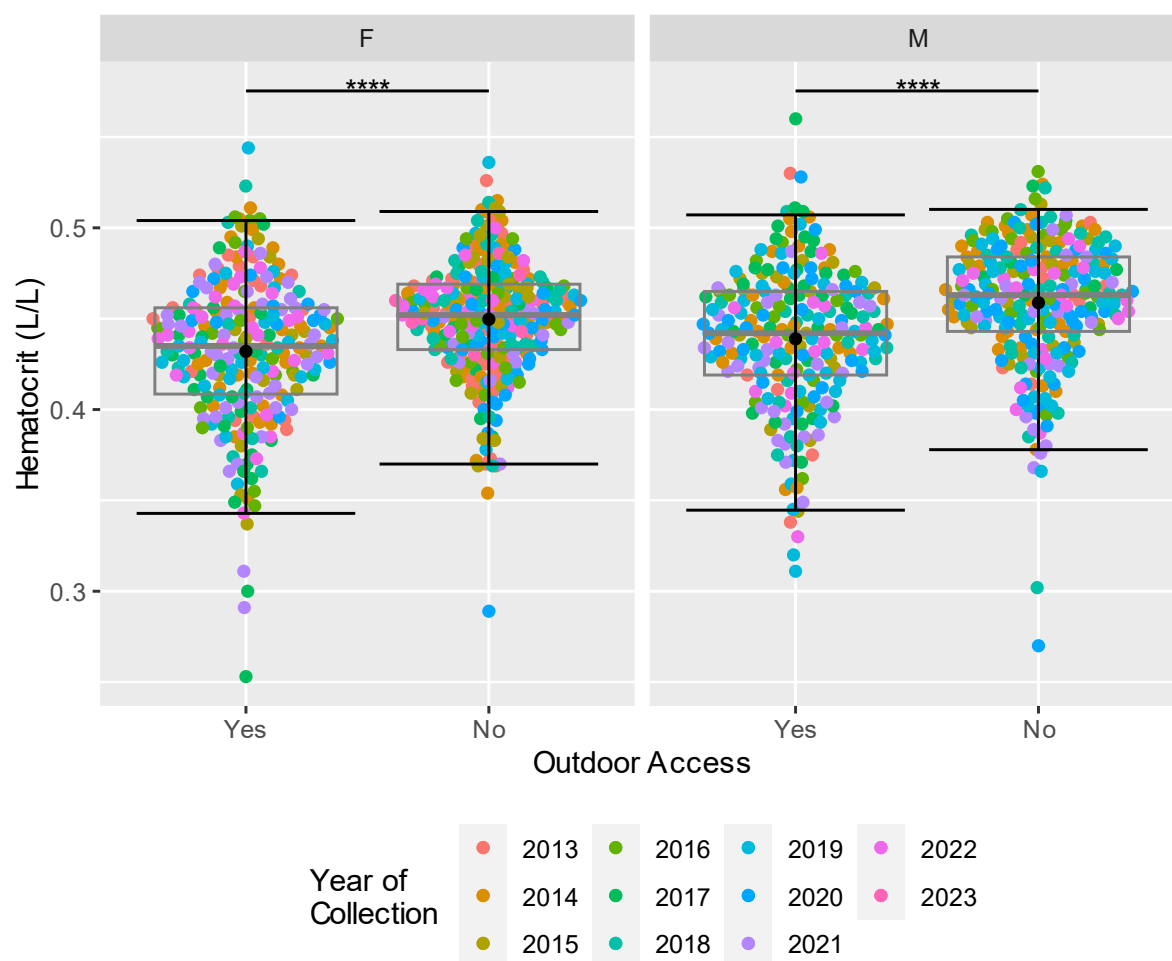

Figure S3 22. Haematocrit according to outdoor access in adult common marmosets. Boxes indicate median and quartile ranges; black point indicates arithmetic mean and error bars indicate the normal range. Symbol colours indicate year of collection; NS = not significant, asterisks indicate statistical significance levels \* < 0.001, \*\* < 0.0001, \*\*\* < 0.00001, \*\*\*\* < 0.000001

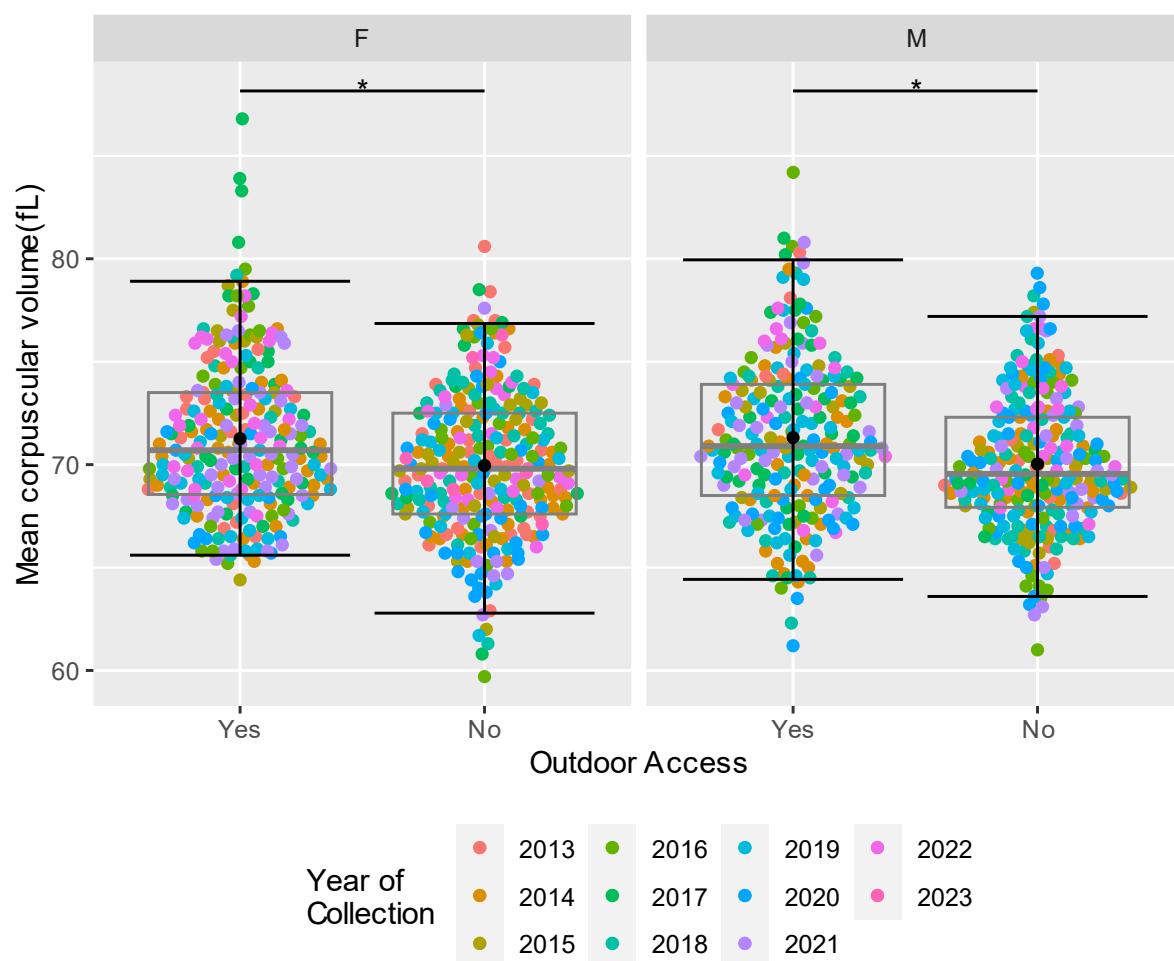

Figure S3 23. Mean Corpuscular Volume according to outdoor access in adult common marmosets. Boxes indicate median and quartile ranges; black point indicates arithmetic mean and error bars indicate the normal range. Symbol colours indicate year of collection; NS = not significant, asterisks indicate statistical significance levels \* < 0.001, \*\* < 0.0001, \*\*\* < 0.00001, \*\*\*\* < 0.000001

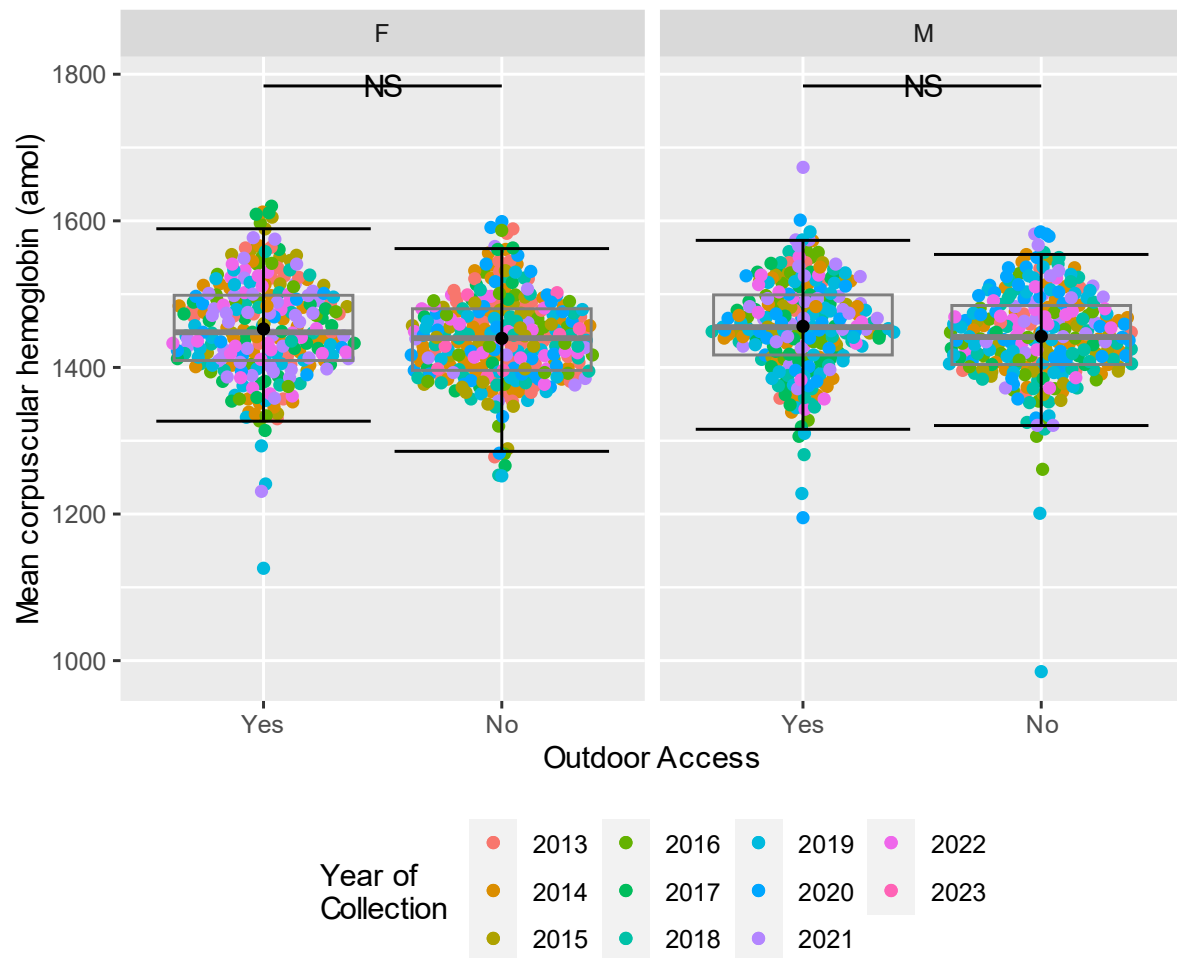

Figure S3 24. Mean Corpuscular Haemoglobin according to outdoor access in adult common marmosets. Boxes indicate median and quartile ranges; black point indicates arithmetic mean and error bars indicate the normal range. Symbol colours indicate year of collection; NS = not significant, asterisks indicate statistical significance levels \* < 0.001, \*\* < 0.0001, \*\*\* < 0.00001, \*\*\*\* < 0.000001



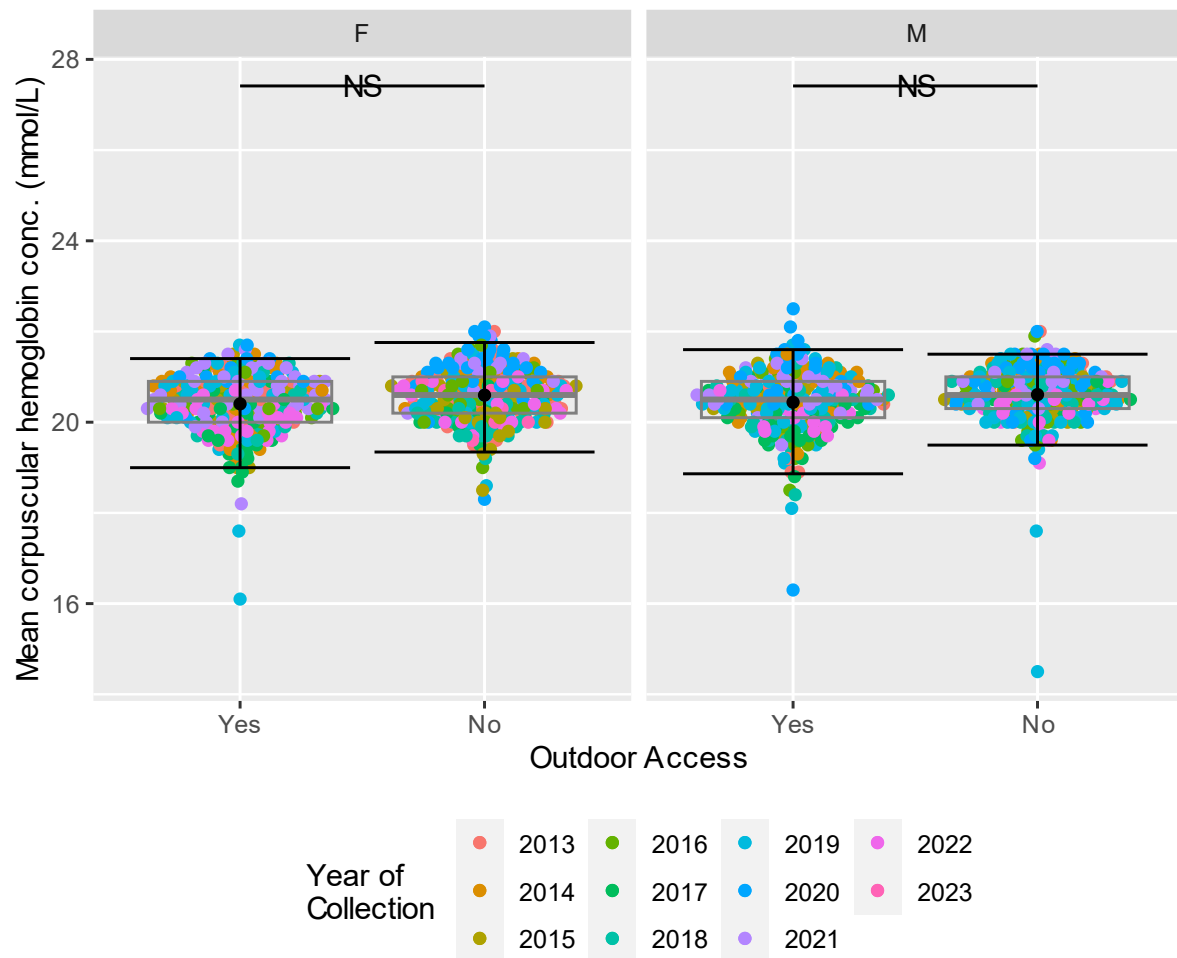

Figure S3 25. Mean Corpuscular Haemoglobin Concentration according to outdoor access in adult common marmosets. Boxes indicate median and quartile ranges; black point indicates arithmetic mean and error bars indicate the normal range. Symbol colours indicate year of collection; NS = not significant, asterisks indicate statistical significance levels \* < 0.001, \*\* < 0.0001, \*\*\* < 0.00001, \*\*\*\* < 0.000001

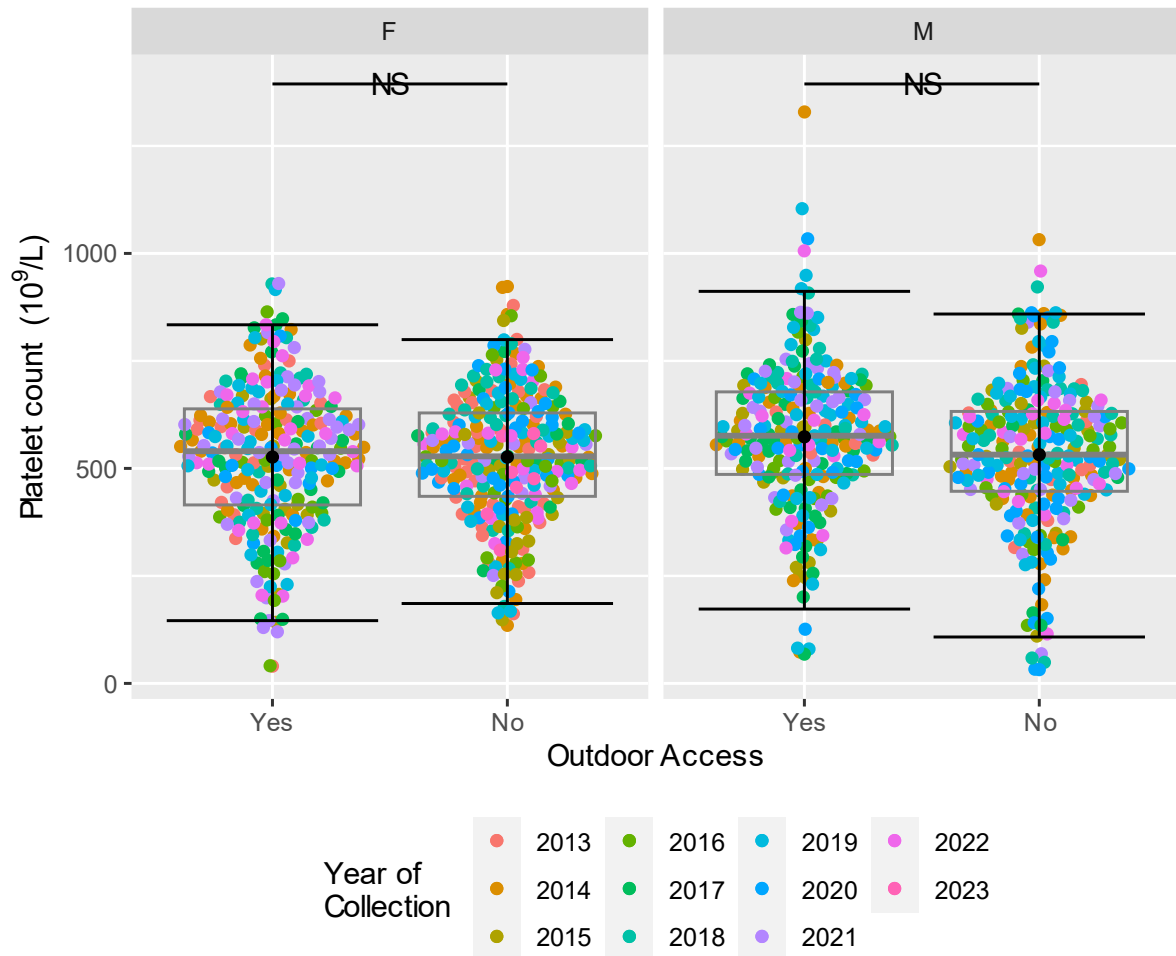

Figure S3 26. Platelet Count according to outdoor access in adult common marmosets. Boxes indicate median and quartile ranges; black point indicates arithmetic mean and error bars indicate the normal range. Symbol colours indicate year of collection; NS = not significant, asterisks indicate statistical significance levels \* < 0.001, \*\* < 0.0001, \*\*\* < 0.00001, \*\*\*\* < 0.000001

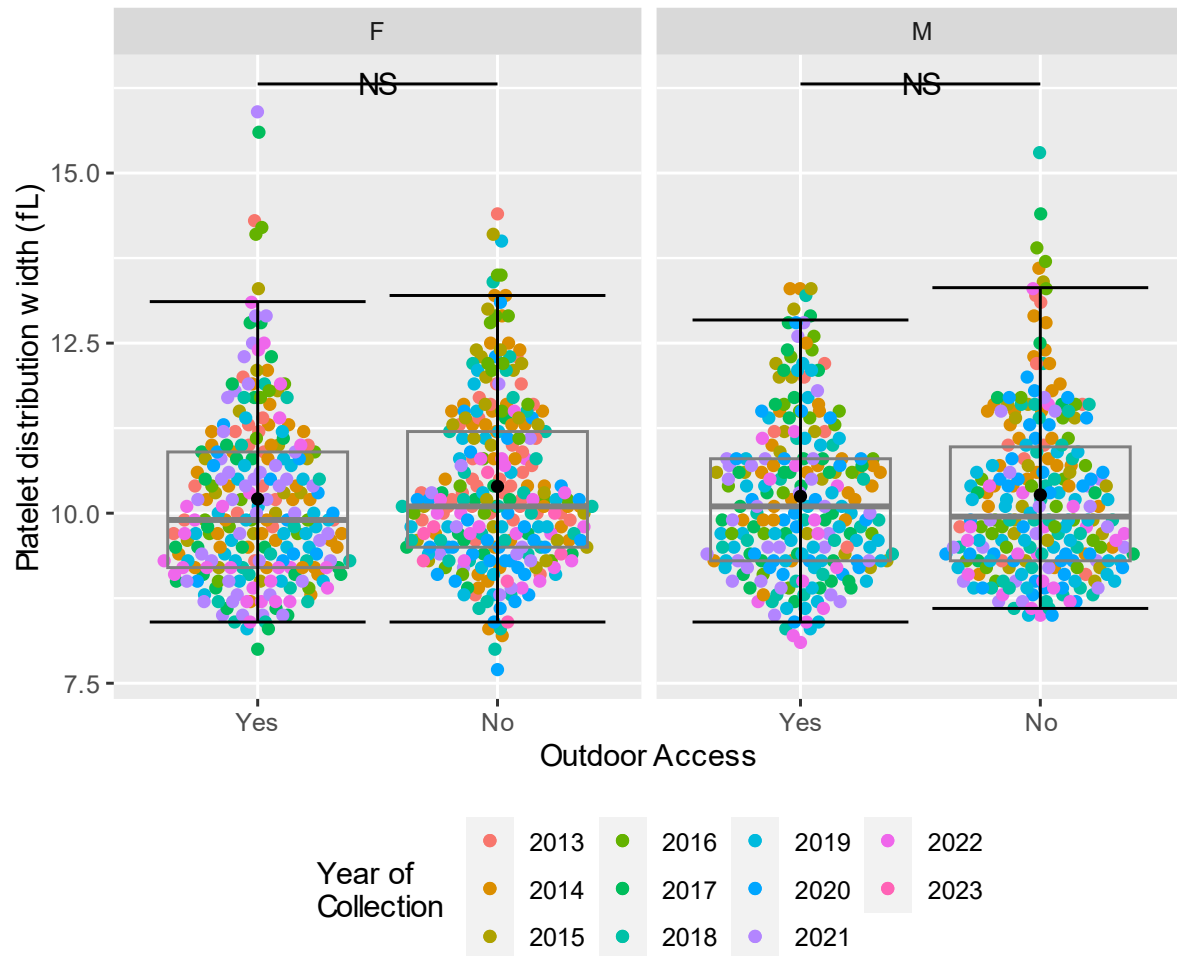

Figure S3 27. Platelet distribution width according to outdoor access in adult common marmosets. Boxes indicate median and quartile ranges; black point indicates arithmetic mean and error bars indicate the normal range. Symbol colours indicate year of collection; NS = not significant, asterisks indicate statistical significance levels \* < 0.001, \*\* < 0.0001, \*\*\* < 0.00001, \*\*\*\* < 0.000001

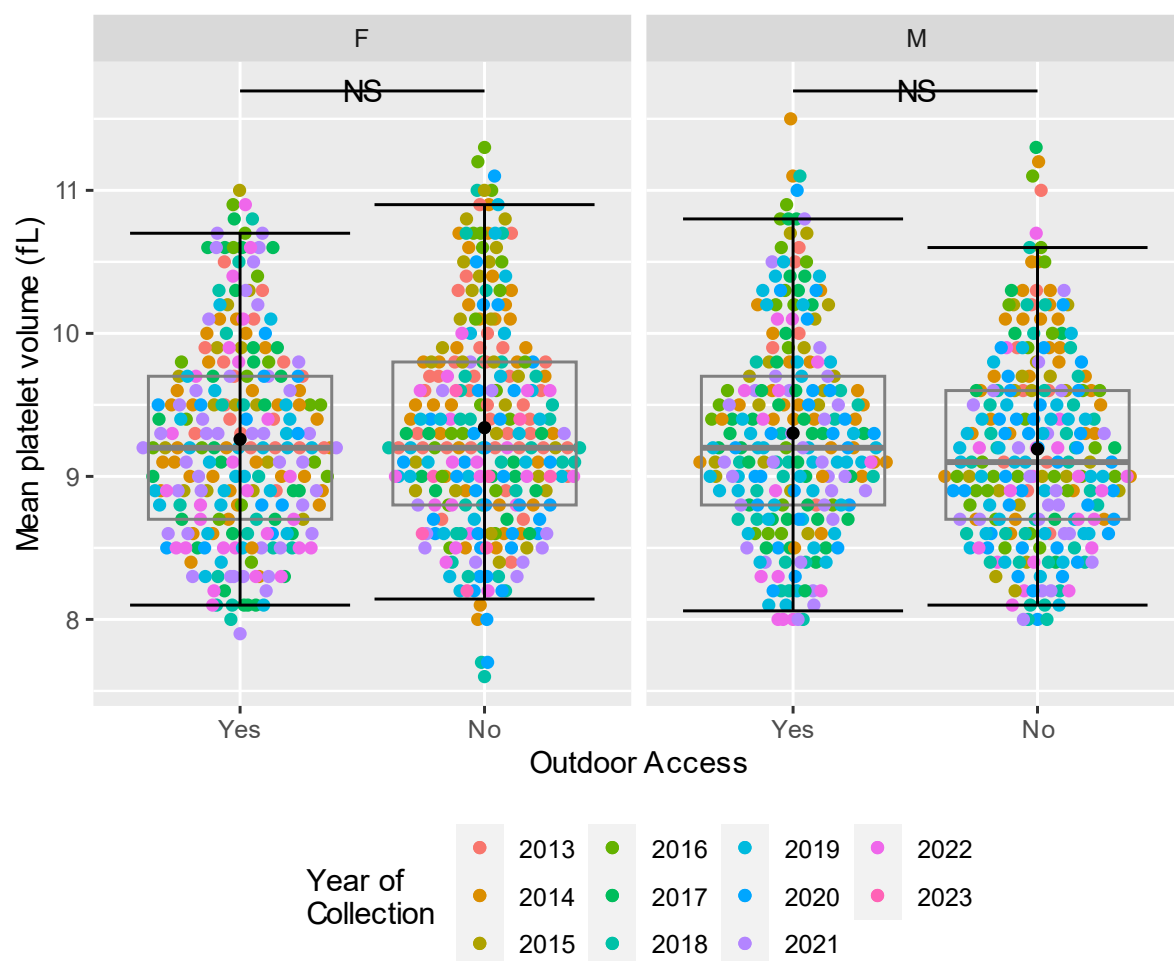

Figure S3 28. Mean Platelet Volume according to outdoor access in adult common marmosets. Boxes indicate median and quartile ranges; black point indicates arithmetic mean and error bars indicate the normal range. Symbol colours indicate year of collection; NS = not significant, asterisks indicate statistical significance levels \* < 0.001, \*\* < 0.0001, \*\*\* < 0.00001, \*\*\*\* < 0.000001

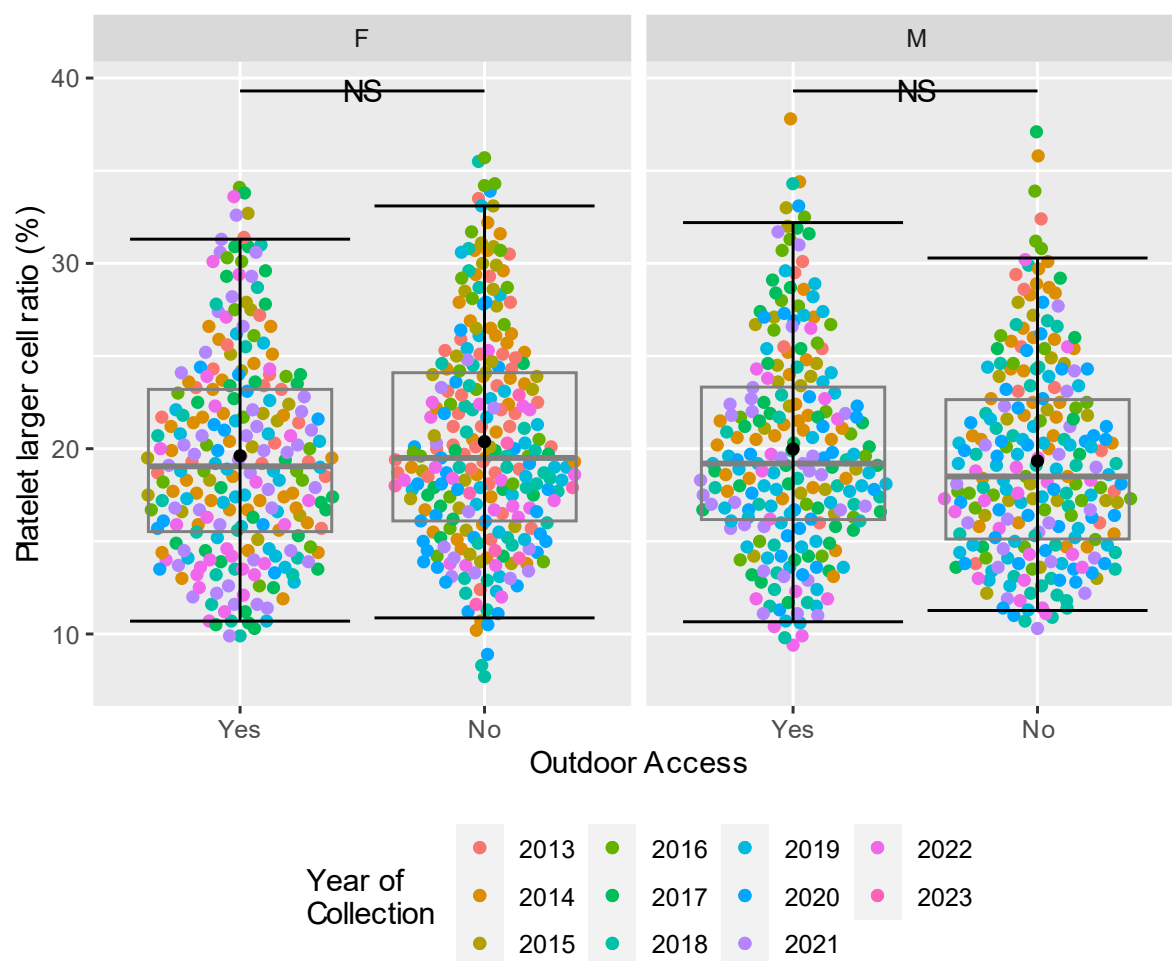

Figure S3 29. Platelet Larger Cell Ratio according to outdoor access in adult common marmosets. Boxes indicate median and quartile ranges; black point indicates arithmetic mean and error bars indicate the normal range. Symbol colours indicate year of collection; NS = not significant, asterisks indicate statistical significance levels \* < 0.001, \*\* < 0.0001, \*\*\* < 0.00001, \*\*\*\* < 0.000001

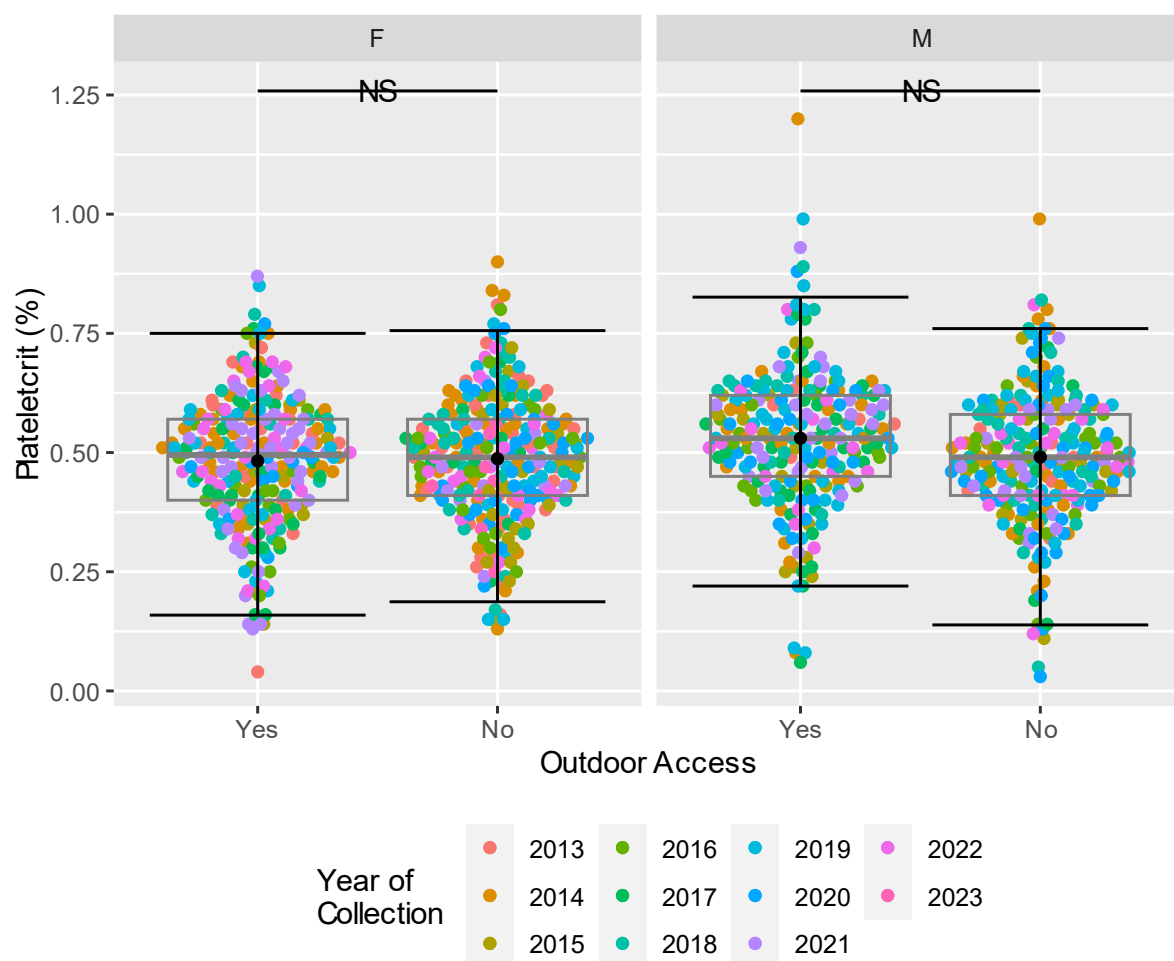

Figure S3 30. Plateletcrit according to outdoor access in adult common marmosets. Boxes indicate median and quartile ranges; black point indicates arithmetic mean and error bars indicate the normal range. Symbol colours indicate year of collection; NS = not significant, asterisks indicate statistical significance levels \* < 0.001, \*\* < 0.0001, \*\*\* < 0.00001, \*\*\*\* < 0.000001

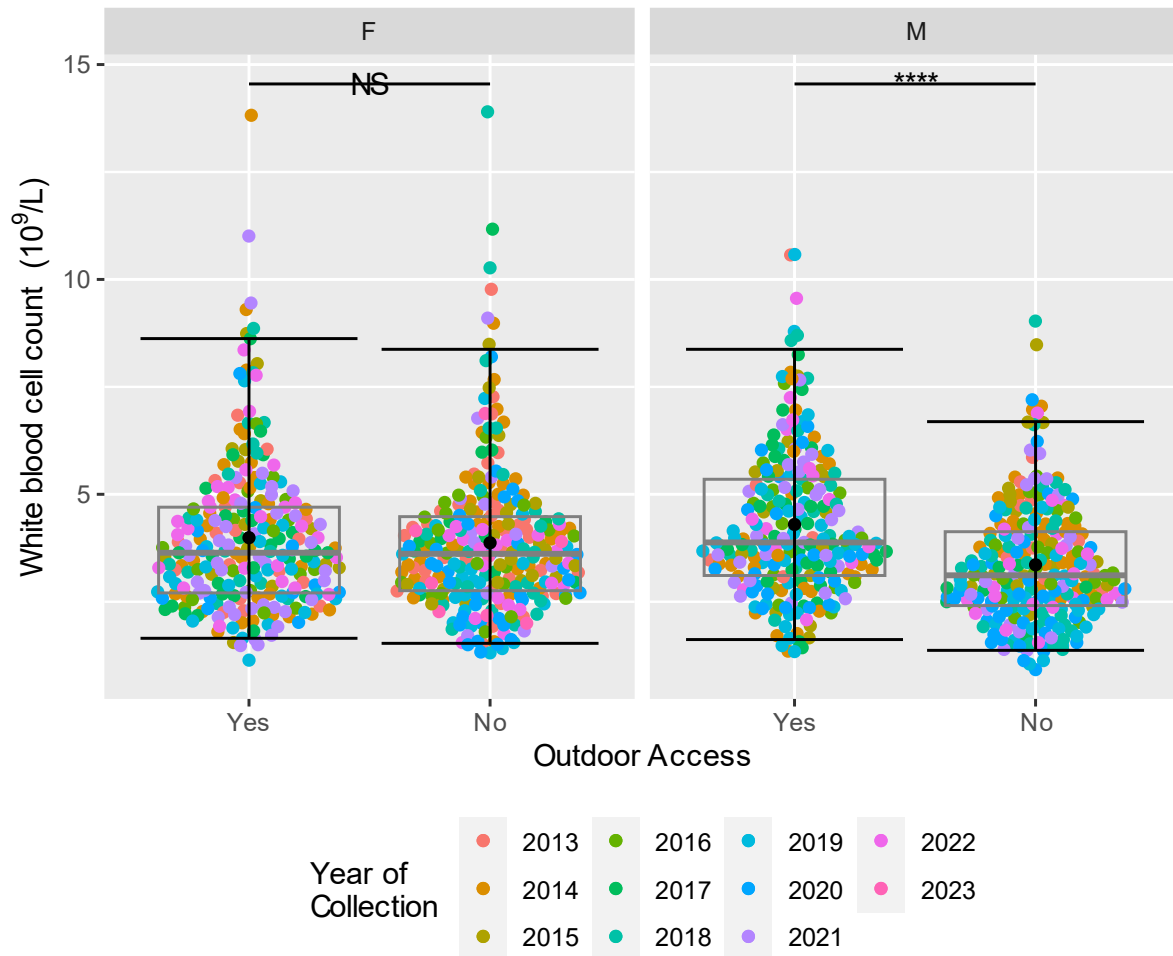

Figure S3 31. White Blood Cell count according to outdoor access in adult common marmosets. Boxes indicate median and quartile ranges; black point indicates arithmetic mean and error bars indicate the normal range. Symbol colours indicate year of collection; NS = not significant, asterisks indicate statistical significance levels \* < 0.001, \*\* < 0.0001, \*\*\* < 0.00001, \*\*\*\* < 0.000001

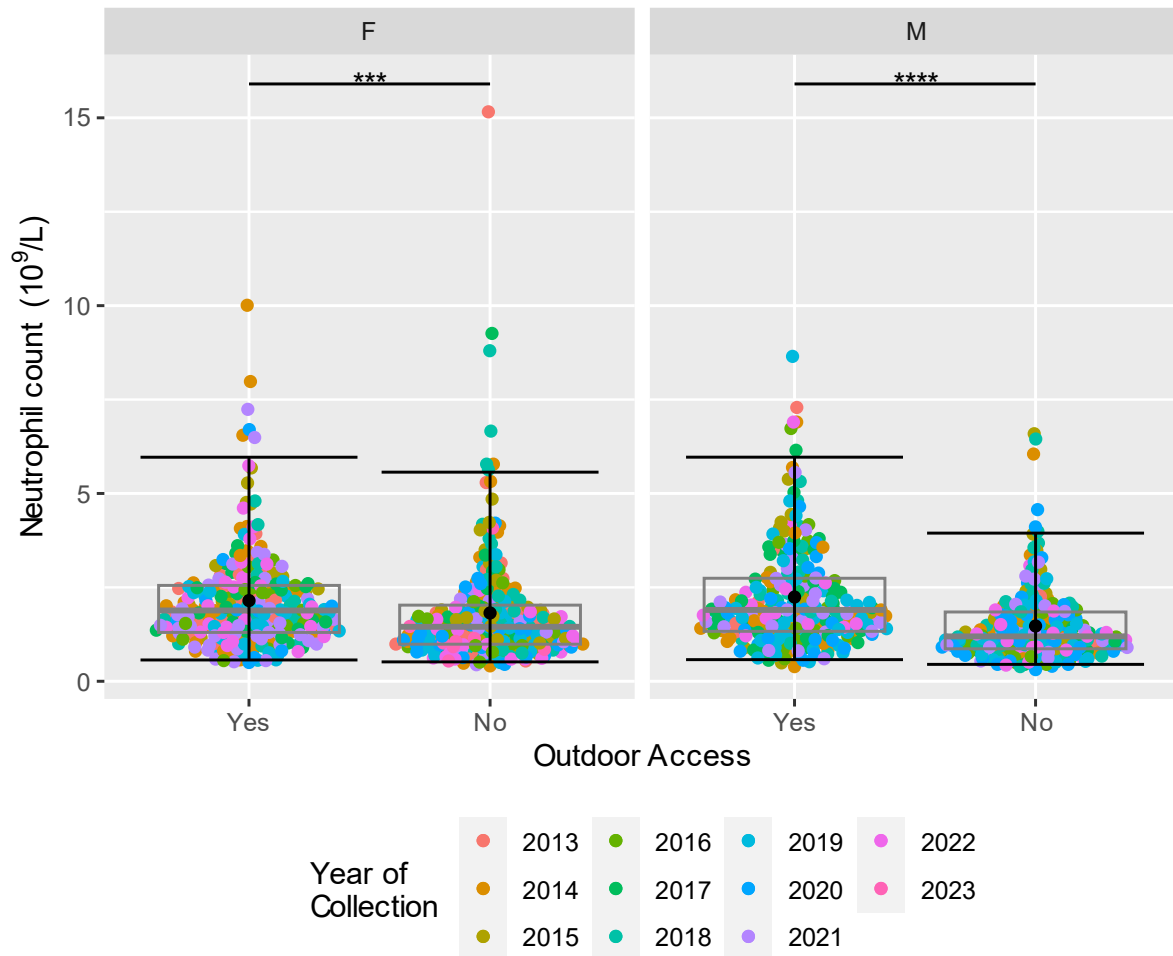

Figure S3 32. Neutrophil count according to outdoor access in adult common marmosets. Boxes indicate median and quartile ranges; black point indicates arithmetic mean and error bars indicate the normal range. Symbol colours indicate year of collection; NS = not significant, asterisks indicate statistical significance levels \* < 0.001, \*\* < 0.0001, \*\*\* < 0.00001, \*\*\*\* < 0.000001



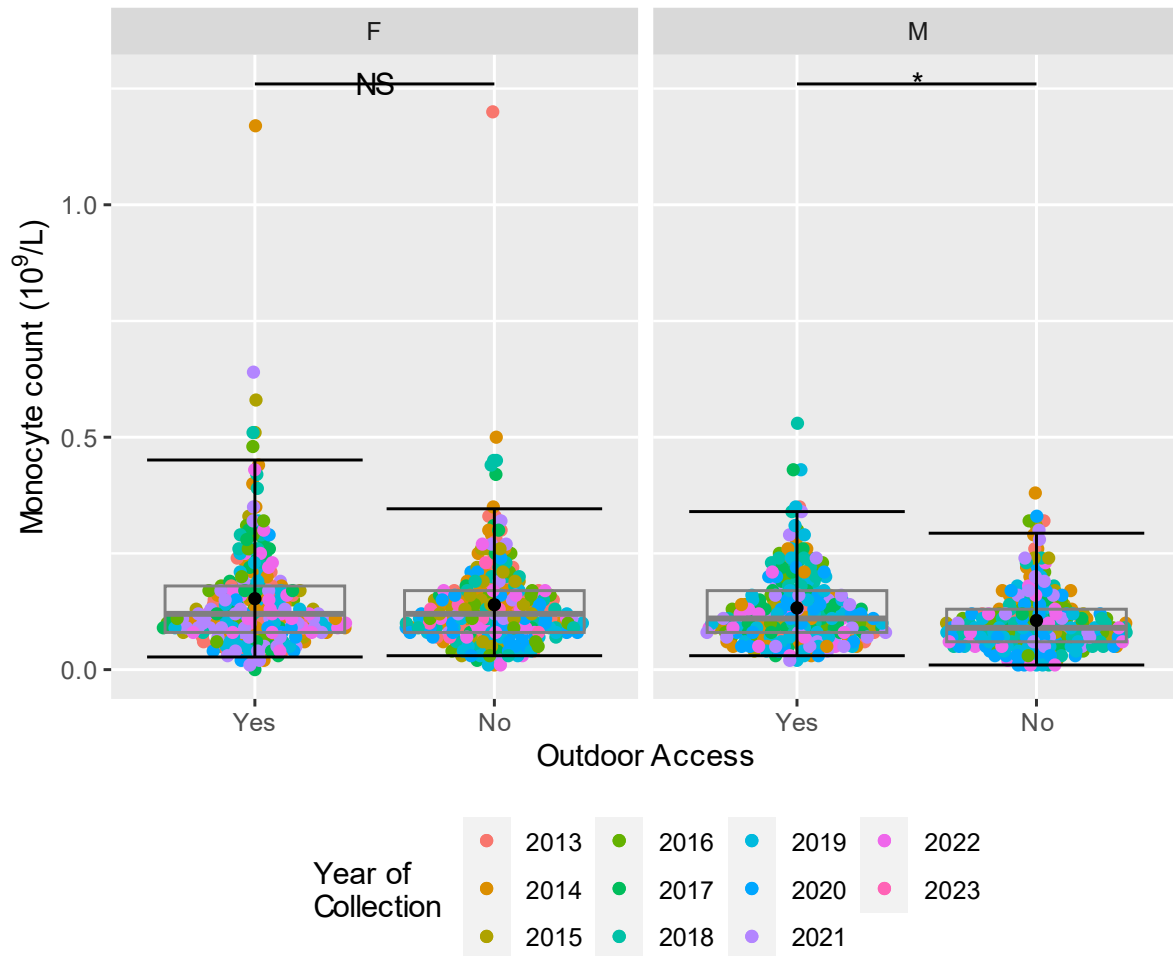

Figure S3 33. Monocyte count according to outdoor access in adult common marmosets. Boxes indicate median and quartile ranges; black point indicates arithmetic mean and error bars indicate the normal range. Symbol colours indicate year of collection; NS = not significant, asterisks indicate statistical significance levels \* < 0.001, \*\* < 0.0001, \*\*\* < 0.00001, \*\*\*\* < 0.000001

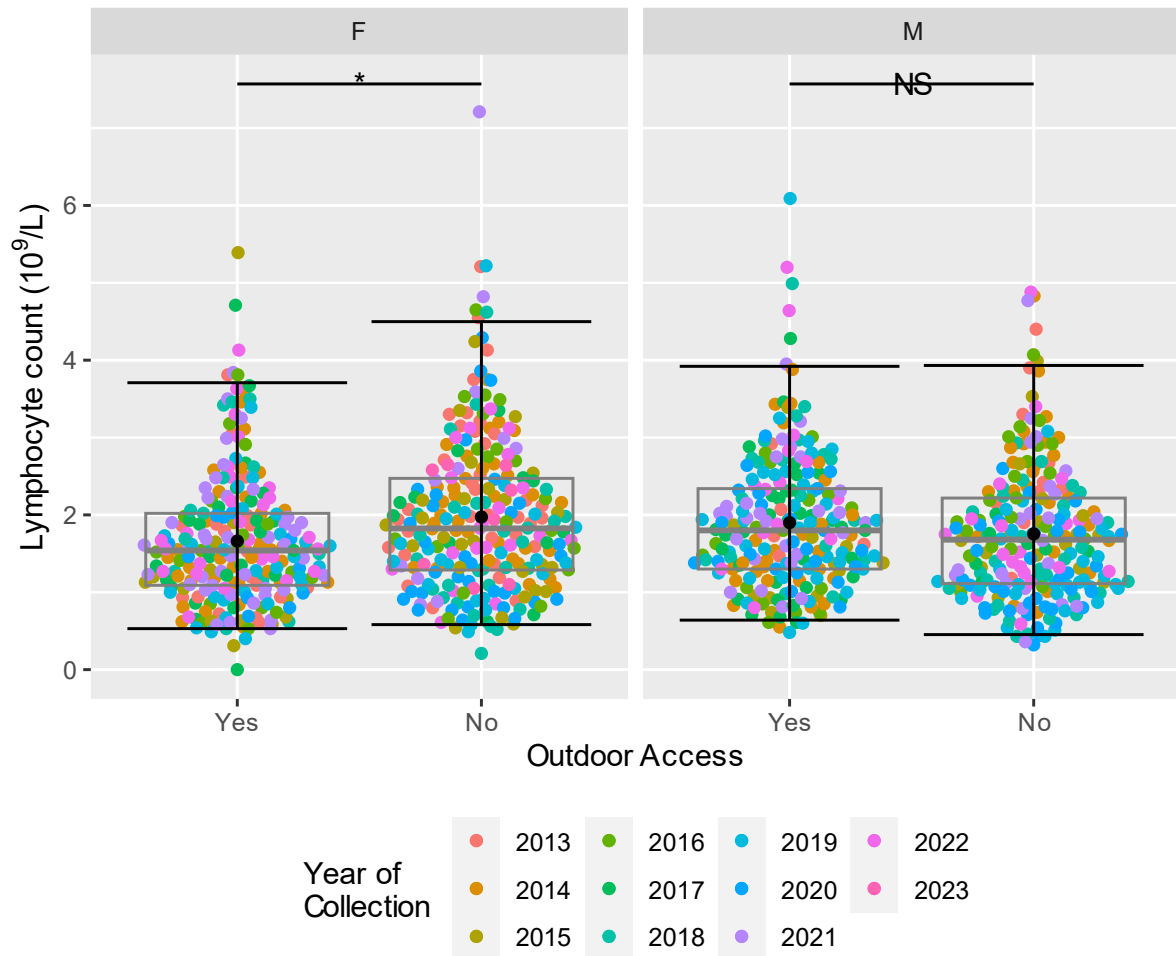

Figure S3 34. Lymphocyte count according to outdoor access in adult common marmosets. Boxes indicate median and quartile ranges; black point indicates arithmetic mean and error bars indicate the normal range. Symbol colours indicate year of collection; NS = not significant, asterisks indicate statistical significance levels \* < 0.001, \*\* < 0.0001, \*\*\* < 0.00001, \*\*\*\* < 0.000001

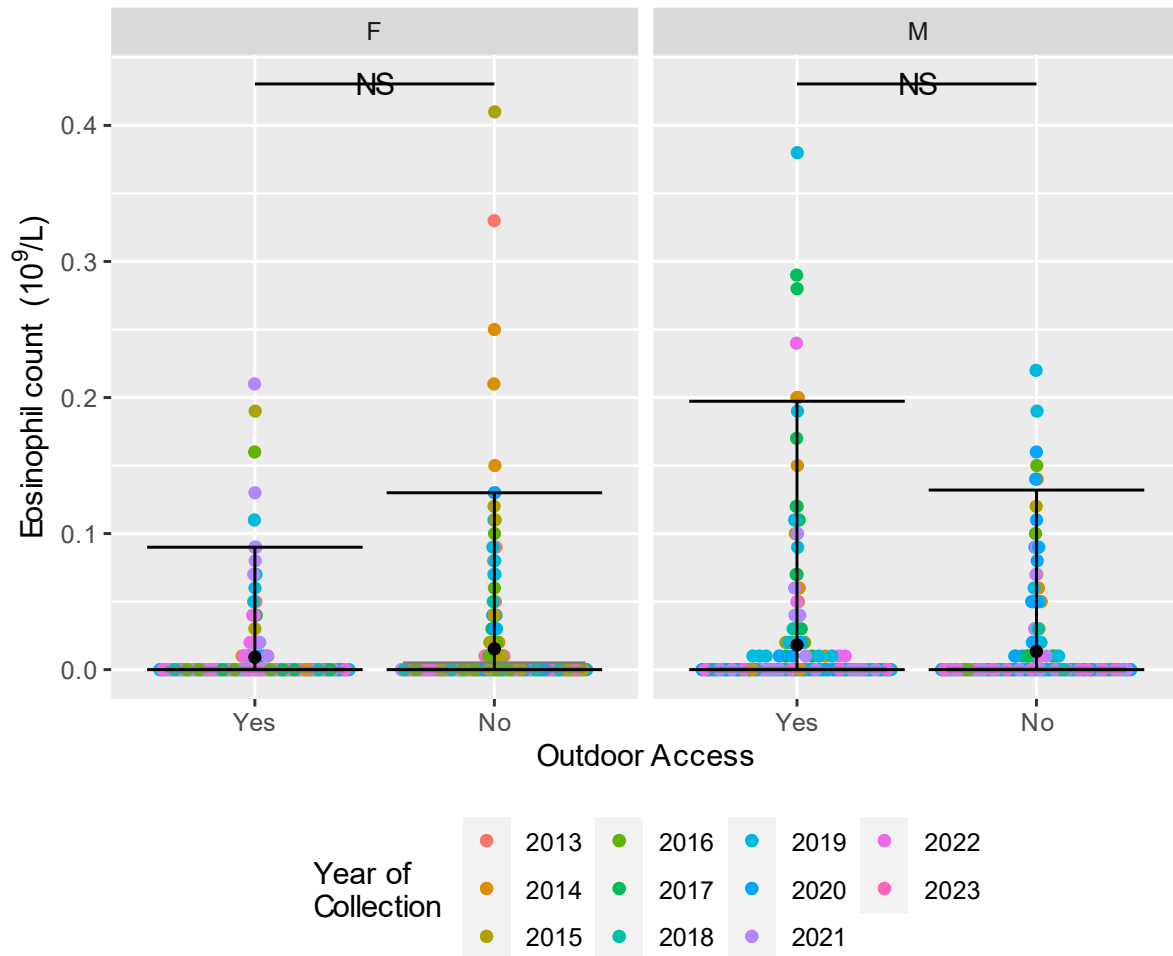

Figure S3 35. Eosinophil count according to outdoor access in adult common marmosets. Boxes indicate median and quartile ranges; black point indicates arithmetic mean and error bars indicate the normal range. Symbol colours indicate year of collection; NS = not significant, asterisks indicate statistical significance levels \* < 0.001, \*\* < 0.0001, \*\*\* < 0.00001, \*\*\*\* < 0.000001

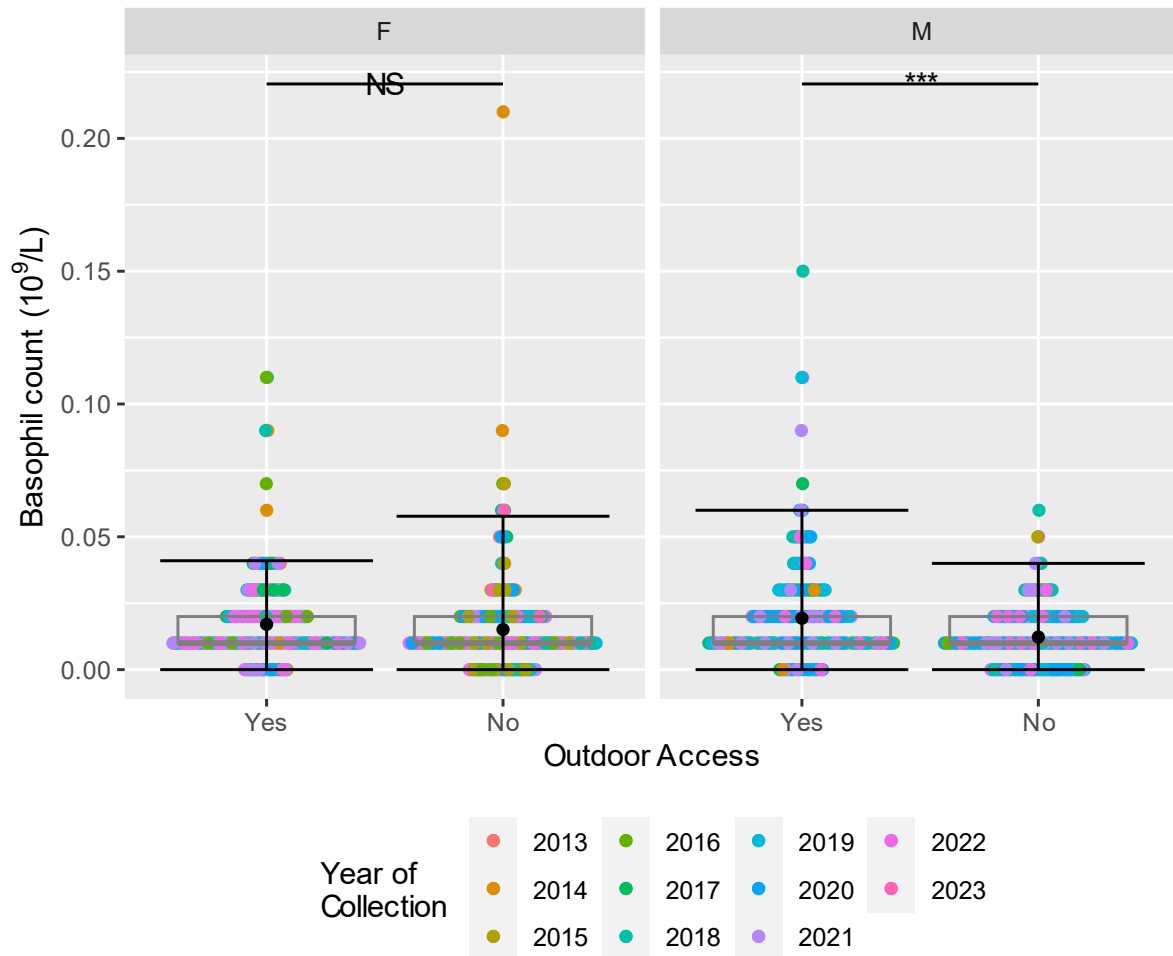

Figure S3 36. Basophil count according to outdoor access in adult common marmosets. Boxes indicate median and quartile ranges; black point indicates arithmetic mean and error bars indicate the normal range. Symbol colours indicate year of collection; NS = not significant, asterisks indicate statistical significance levels \*  $< 0.001$ , \*\*  $< 0.0001$ , \*\*\*  $< 0.00001$ , \*\*\*\*  $< 0.000001$
